# Supplementary material for: Impact of carboxylate ligation on the C–H activation reactivity of a non-heme Fe(iv)O complex: a computational investigation
Source: Royal Society of Chemistry journal article supplement (doi:10.1039/d4dt02139h), 2024-01-01
Supplement: d4dt02139h1.pdf [file d4dt02139h1.pdf]

## Impact of Carboxylate Ligation on the C-H Activation Reactivity of Non-heme Fe(IV)O Complex: A Computational Investigation

Akanksha Katoch and Debasish Mandal\*

Department of Chemistry and Biochemistry, Thapar Institute of Engineering and Technology,  
Patiala-147001, Punjab, India

Corresponding author: [debasish.mandal@thapar.edu](mailto:debasish.mandal@thapar.edu)

| S. No. | CONTENTS                                                                                                                                     | Page no.     |
|--------|----------------------------------------------------------------------------------------------------------------------------------------------|--------------|
| 1      | <b>Table S1</b> The relative energies (in kcal mol <sup>-1</sup> ) for all the investigated reactions computed at different levels of theory | <b>S2-S3</b> |
| 2      | <b>Table S2</b> Calculated and experimental bond dissociation energy and enthalpy computed at B3LYP and CBS-QB3 method.                      | <b>S3</b>    |
| 3      | <b>Table S3</b> Calculated free space for oxidants.                                                                                          | <b>S3</b>    |
| 4      | <b>Fig. S1</b> The potential energy profile computed for C–H activation reactions of 1+DMB with the associated transition state.             | <b>S4</b>    |
| 5      | <b>Fig. S2</b> Spin natural orbitals and their occupations for the oxidant of complex 1.                                                     | <b>S4</b>    |
| 6      | <b>Fig. S3</b> Spin natural orbitals and their occupations for the transition states of the reaction between complex 1 and EB.               | <b>S4</b>    |
| 7      | <b>Fig. S4</b> Spin natural orbitals and their occupations for the intermediates of the reaction between complex 1 and EB.                   | <b>S5</b>    |
| 8      | <b>Fig. S5</b> Spin natural orbitals and their occupations for the transition states of the reaction between complex 1 and DHT.              | <b>S5</b>    |
| 9      | <b>Fig. S6</b> Spin natural orbitals and their occupations for the intermediates of the reaction between complex 1 and DHT.                  | <b>S6</b>    |
| 10     | <b>Fig. S7</b> Spin natural orbitals and their occupations for the oxidant of the complex 2.                                                 | <b>S6</b>    |
| 11     | <b>Fig. S8</b> Spin natural orbitals and their occupations for the transition states of the reaction between complex 2 and EB.               | <b>S7</b>    |
| 12     | <b>Fig. S9</b> Spin natural orbitals and their occupations for the intermediates of the reaction between complex 2 and EB.                   | <b>S7</b>    |
| 13     | <b>Fig. S10</b> Spin natural orbitals and their occupations for the transition states of the reaction between complex 2 and DHT.             | <b>S8</b>    |
| 14     | <b>Fig. S11</b> Spin natural orbitals and their occupations for the intermediates of the reaction between complex 2 and DHT.                 | <b>S8</b>    |
| 15     | <b>Fig. S12</b> Spin natural orbitals and their occupations for the oxidant of the complex 3.                                                | <b>S8</b>    |
| 16     | <b>Fig. S13</b> Spin natural orbitals and their occupations for the transition states of the reaction between complex 3 and EB.              | <b>S9</b>    |

- 17 **Fig. S14** Spin natural orbitals and their occupations for the intermediates of the reaction between complex 3 and EB. **S9**
- 18 **Fig. S15** Spin natural orbitals and their occupations for the oxidant of the complex 4. **S10**
- 19 **Fig. S16** Spin natural orbitals and their occupations for the transition states of the reaction between complex 4 and EB. **S10**
- 20 **Fig. S17** Spin natural orbitals and their occupations for the intermediates of the reaction between complex 4 and EB. **S10**
- 21 **Table S4** Mulliken spin densities and charges for oxidants. **S11**
- 22 **Table S5** Mulliken spin densities and charges of stationary points along S=1 and S=2. **S11**
- 23 Cartesian coordinates and thermochemistry data of all the stationary points computed at B1 Level of Theory **S12-30**

**Table S1** The relative energies and free energies at 298K (kcal mol<sup>-1</sup>) for all the species involved in the investigated reactions computed at different levels of theory.

| Reactions | Spin state | Species         | B1+ZPE | B2+ZPE | B2+G <sup>corr</sup> |
|-----------|------------|-----------------|--------|--------|----------------------|
| 1-EB      | S=1        | <sup>3</sup> RC | 0.0    | 0.0    | 0.0                  |
|           |            | <sup>3</sup> TS | 17.5   | 14.9   | 26.3                 |
|           |            | <sup>3</sup> IH | 1.7    | -4.5   | 5.1                  |
|           | S=2        | <sup>5</sup> RC | 9.9    | 6.5    | 3.8                  |
|           |            | <sup>5</sup> TS | 21.3   | 12.0   | 21.5                 |
|           |            | <sup>5</sup> IH | 7.9    | -6.9   | 0.5                  |
| 2-EB      | S=1        | <sup>3</sup> RC | 0.0    | 0.0    | 0.0                  |
|           |            | <sup>3</sup> TS | 10.8   | 14.2   | 25.8                 |
|           |            | <sup>3</sup> IH | -4.3   | -4.3   | 5.6                  |
|           | S=2        | <sup>5</sup> RC | 1.6    | 2.9    | 3.7                  |
|           |            | <sup>5</sup> TS | 9.8    | 9.2    | 18.6                 |
|           |            | <sup>5</sup> IH | -10.1  | -14.2  | -6.4                 |
| 1-DHT     | S=1        | <sup>3</sup> RC | 0.0    | 0.0    | 0.0                  |
|           |            | <sup>3</sup> TS | 11.6   | 10.5   | 22.3                 |
|           |            | <sup>3</sup> IH | -11.2  | -16.6  | -7.2                 |
|           | S=2        | <sup>5</sup> RC | 9.9    | 6.5    | 3.8                  |
|           |            | <sup>5</sup> TS | 15.4   | 7.5    | 17.1                 |
|           |            | <sup>5</sup> IH | 1.6    | -18.6  | -10.4                |
| 2-DHT     | S=1        | <sup>3</sup> RC | 0.0    | 0.0    | 0.0                  |
|           |            | <sup>3</sup> TS | 6.3    | 9.9    | 21.0                 |
|           |            | <sup>3</sup> IH | -16.7  | -16.0  | -6.8                 |
|           | S=2        | <sup>5</sup> RC | 1.6    | 2.9    | 3.7                  |
|           |            | <sup>5</sup> TS | 5.4    | 3.6    | 13.0                 |
|           |            | <sup>5</sup> IH | -23.0  | -25.3  | -17.0                |
|           | S=1        | <sup>3</sup> RC | 0.0    | 0.0    | 0.0                  |

|                 |     |                 |       |      |      |
|-----------------|-----|-----------------|-------|------|------|
| 3-EB            |     | <sup>3</sup> TS | 14.3  | 13.4 | 24.7 |
|                 |     | <sup>3</sup> IH | -2.3  | -3.7 | 9.4  |
|                 |     |                 |       |      |      |
|                 | S=2 | <sup>5</sup> RC | 2.1   | 2.0  | 3.6  |
|                 |     | <sup>5</sup> TS | 9.5   | 7.8  | 17.5 |
| <sup>5</sup> IH |     | -12.1           | -15.4 | -3.5 |      |
|                 |     |                 |       |      |      |
| 4-EB            | S=1 | <sup>3</sup> RC | 0.0   | 0.0  | 0.0  |
|                 |     | <sup>3</sup> TS | 14.9  | 11.4 | 22.3 |
|                 |     | <sup>3</sup> IH | -3.6  | -1.5 | 10.3 |
|                 |     |                 |       |      |      |
|                 | S=2 | <sup>5</sup> RC | 3.9   | 1.5  | 2.7  |
|                 |     | <sup>5</sup> TS | 6.0   | 5.7  | 16.1 |
| <sup>3</sup> IH |     | -17.4           | -12.3 | -1.2 |      |
|                 |     |                 |       |      |      |
| 1-DMB           | S=1 | <sup>3</sup> RC | 0.0   | 0.0  | 0.0  |
|                 |     | <sup>3</sup> TS | 20.4  | 17.6 | 29.6 |
|                 |     | <sup>3</sup> IH | 9.5   | 3.4  | 12.3 |
|                 |     |                 |       |      |      |
|                 | S=2 | <sup>5</sup> RC | 9.9   | 6.5  | 3.8  |
|                 |     | <sup>5</sup> TS | 22.0  | 15.3 | 24.4 |
| <sup>3</sup> IH |     | 13.7            | 4.4   | 11.5 |      |

**Table S2** Calculated and experimental bond dissociation energy and enthalpy (kcal mol<sup>-1</sup>) computed at B3LYP and CBS-QB3 method.

| Substrate | B3LYP                   |                         | CBS-QB3                 |                         | Experiment |
|-----------|-------------------------|-------------------------|-------------------------|-------------------------|------------|
|           | $\Delta E_{\text{BDE}}$ | $\Delta H_{\text{BDE}}$ | $\Delta E_{\text{BDE}}$ | $\Delta H_{\text{BDE}}$ |            |
| DHT       | 70.7                    | 72.3                    | 74.6                    | 75.2                    | 77.0*      |
| EB        | 83.1                    | 84.6                    | 82.6                    | 84.2                    | 85.4**     |

\*Y. R. Luo, *Comprehensive Handbook of Chemical Bond Energies*, Taylor & Francis, Boca Raton, 2007 \*\**J. Org. Chem.*, 2019, **84**, 13549–13556.

**Table S3** Calculated % volume buried and % free space for oxidants computed on the geometry optimized at B1 level of theory.

| Oxidants | Spin state | % Volume buried | % Free space |
|----------|------------|-----------------|--------------|
| 1        | S=1        | 92.4            | 7.6          |
|          | S=2        | 91.4            | 8.6          |
|          |            |                 |              |
| 2        | S=1        | 87.1            | 12.9         |
|          | S=2        | 86.9            | 13.1         |
|          |            |                 |              |
| 3        | S=1        | 86.5            | 13.5         |
|          | S=2        | 84.2            | 15.8         |
|          |            |                 |              |
| 4        | S=1        | 84.6            | 15.4         |
|          | S=2        | 81.9            | 18.1         |

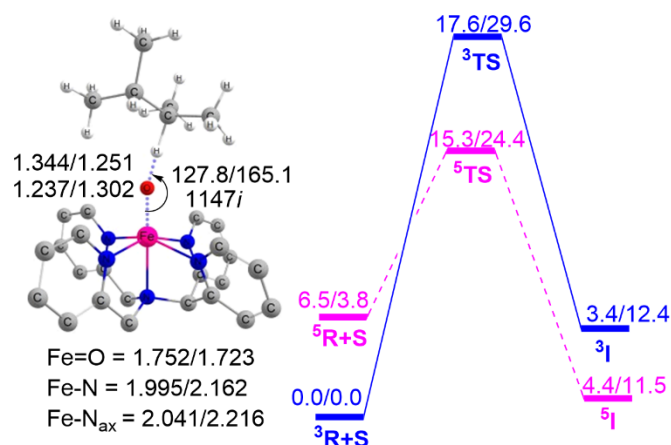

**Fig. S1** The potential energy profile computed for C–H activation reactions of 1+DMB with the associated transition state. The energies are stated as  $\Delta E$  (B2+ZPE)/  $\Delta G$ (B2+  $G^{\text{corr}}_{298\text{K}}$ ) in kcal mol<sup>-1</sup>. Both triplet/quintet spin state geometric parameters are provided along with the lengths and angles expressed in angstroms and degrees, respectively.

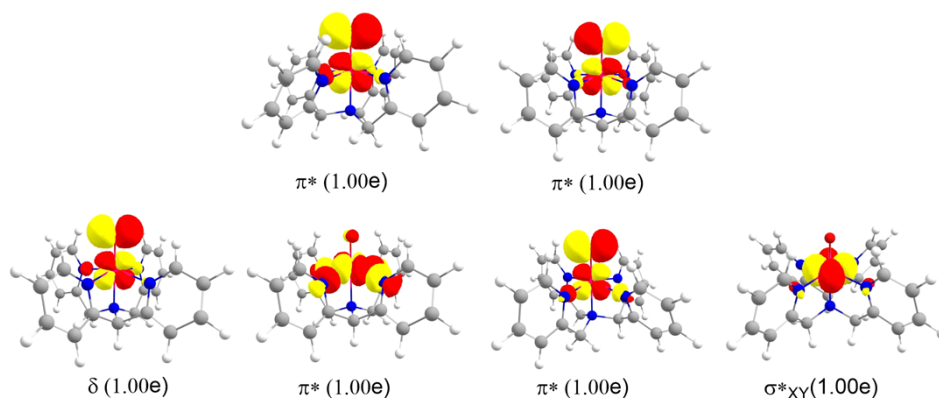

**Fig. S2** Spin natural orbitals and their occupations for the oxidants of complex 1. The upper panel represents <sup>3</sup>R while the bottom panel represents <sup>5</sup>R.

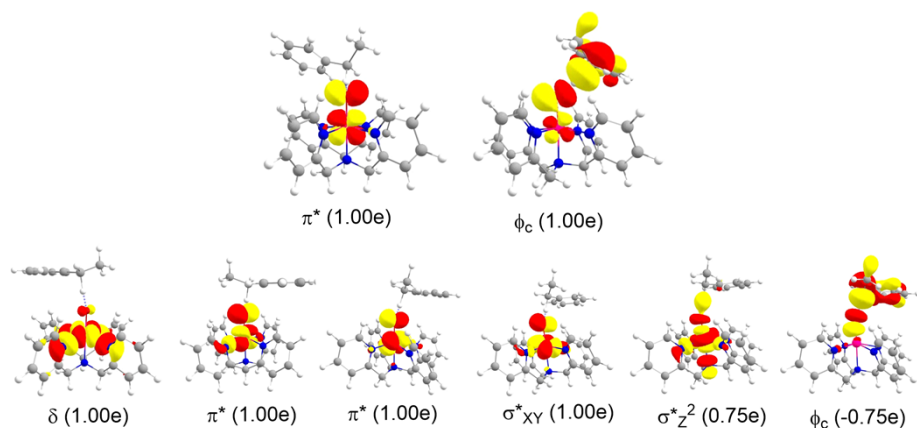

**Fig. S3** Spin natural orbitals and their occupations for the transition states of the reaction between complex 1 and EB. The upper panel represents  $^3R$  while the bottom panel represents  $^5R$ .

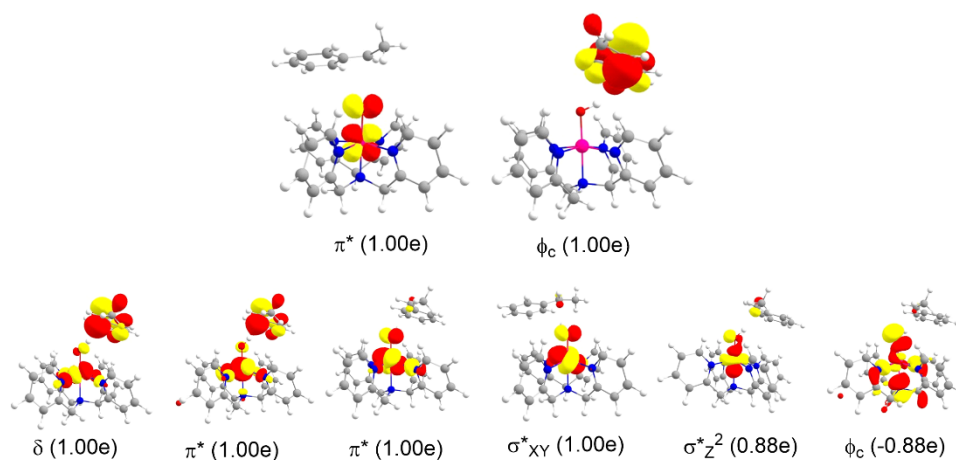

**Fig. S4** Spin natural orbitals and their occupations for the intermediates of the reaction between complex 1 and EB. The upper panel represents  $^3R$  while the bottom panel represents  $^5R$ .

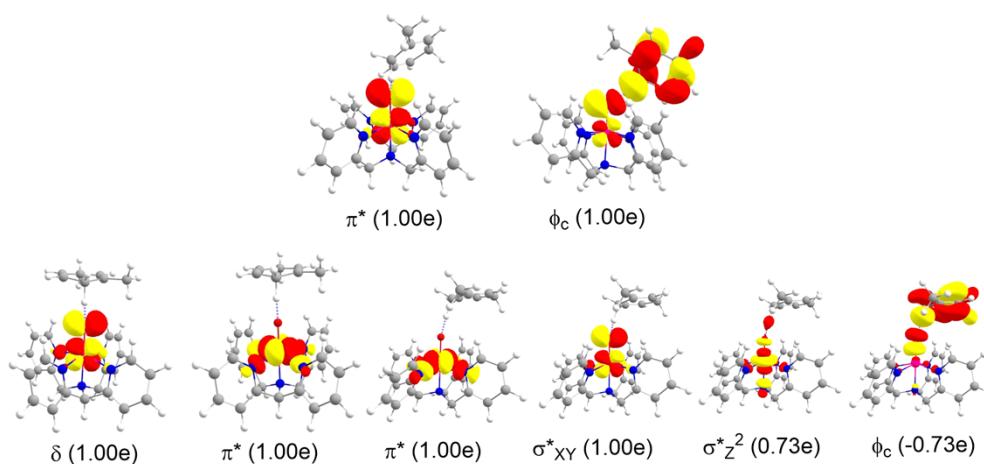

**Fig. S5** Spin natural orbitals and their occupations for the transition states of the reaction between complex 1 and DHT. The upper panel represents  $^3R$  while the bottom panel represents  $^5R$ .

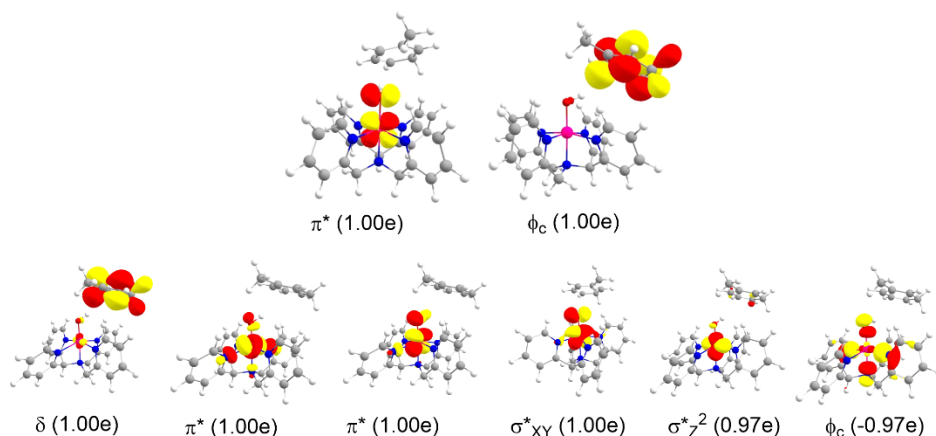

**Fig. S6** Spin natural orbitals and their occupations for the intermediates of the reaction between complex 1 and DHT. The upper panel represents  $^3R$  while the bottom panel represents  $^5R$ .

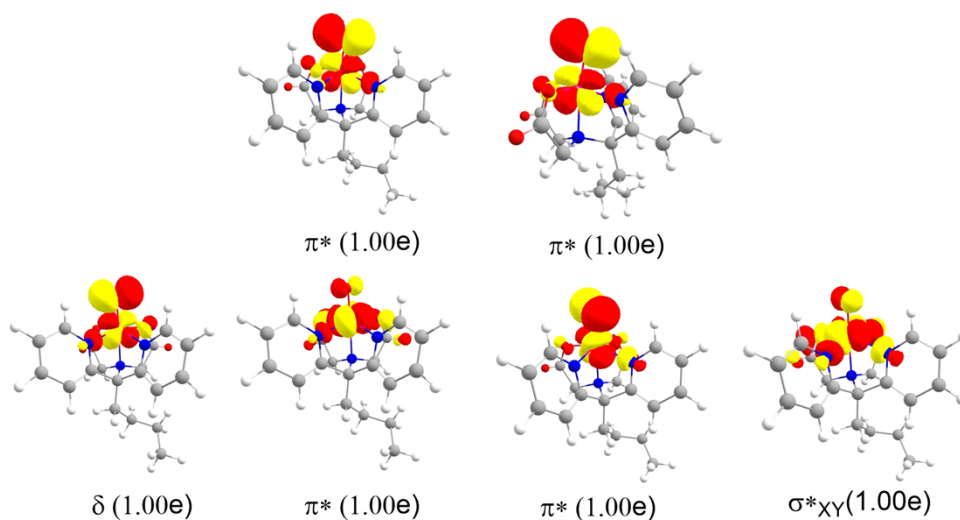

**Fig. S7** Spin natural orbitals and their occupations for the oxidants of complex 2. The upper panel represents  $^3R$  while the bottom panel represents  $^5R$ .

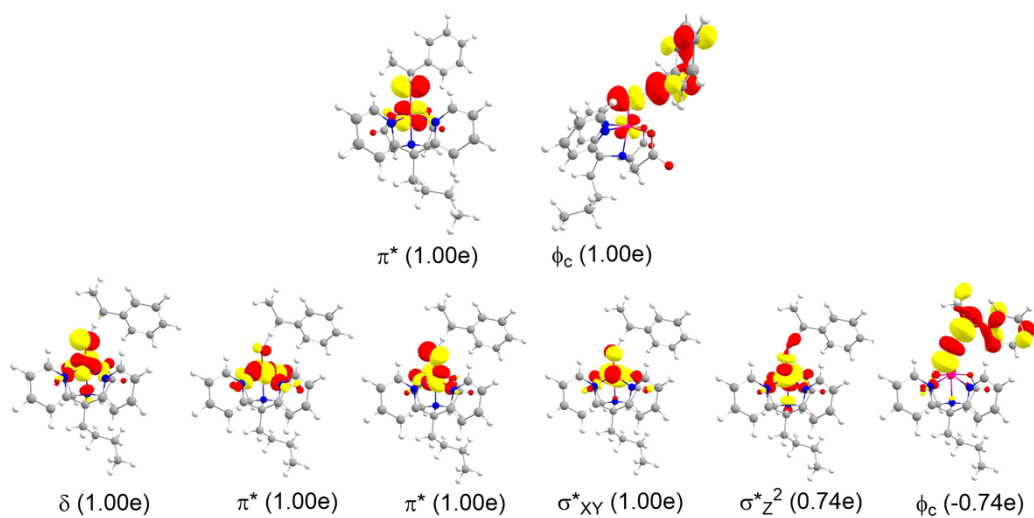

**Fig. S8** Spin natural orbitals and their occupations for the transition states of the reaction between complex 2 and EB. The upper panel represents  $^3R$  while the bottom panel represents  $^5R$ .

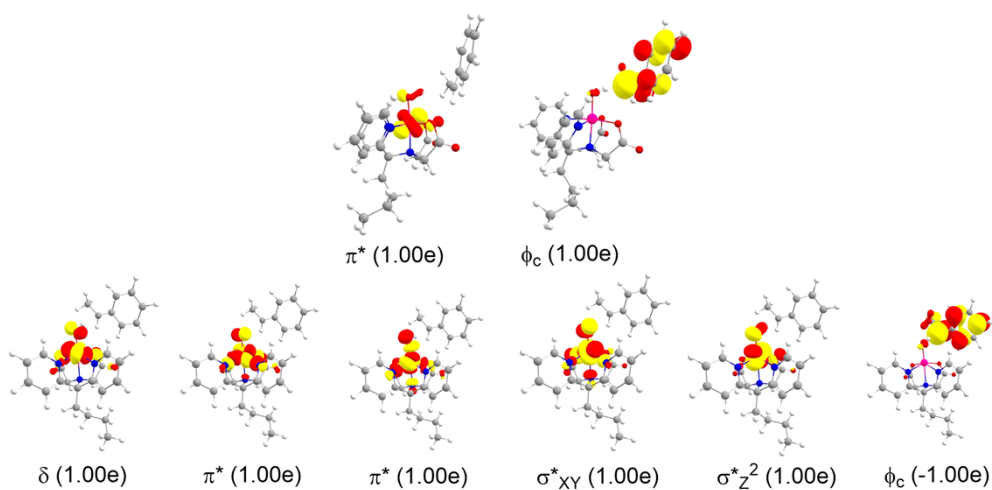

**Fig. S9** Spin natural orbitals and their occupations for the intermediates of the reaction between complex 2 and EB. The upper panel represents  $^3R$  while the bottom panel represents  $^5R$ .

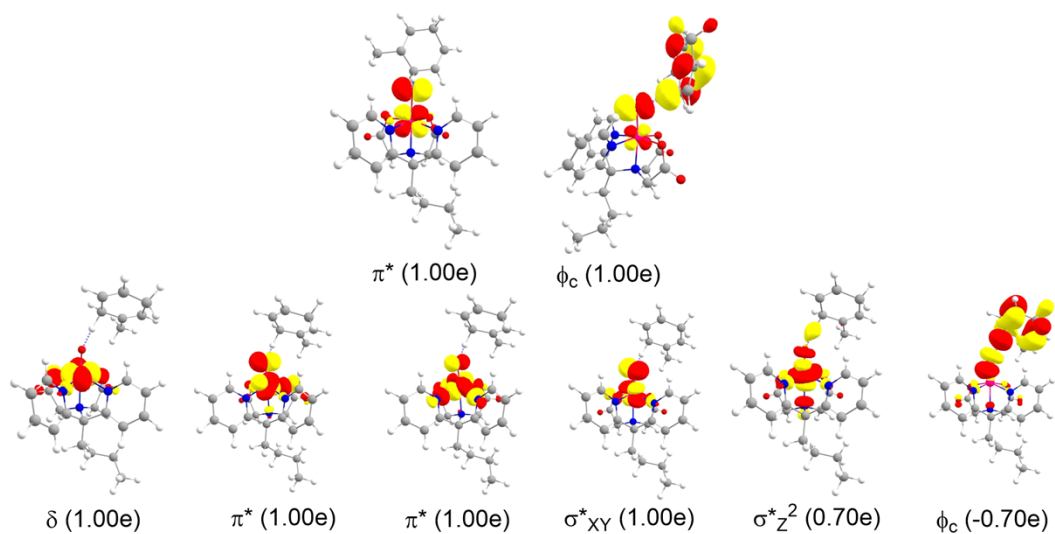

**Fig. S10** Spin natural orbitals and their occupations for the transition states of the reaction between complex 2 and DHT. The upper panel represents  $^3R$  while the bottom panel represents  $^5R$ .

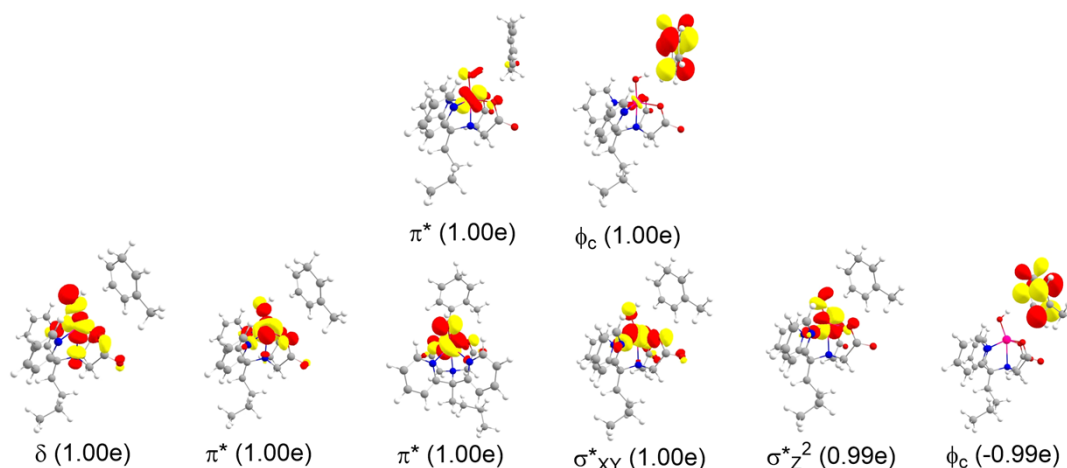

**Fig. S11** Spin natural orbitals and their occupations for the intermediates of the reaction between complex 2 and DHT. The upper panel represents  $^3R$  while the bottom panel represents  $^5R$ .

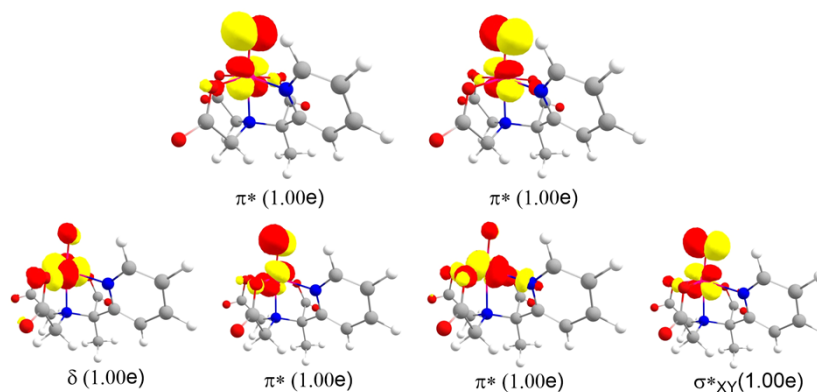

**Fig. S12** Spin natural orbitals and their occupations for the oxidants of complex 3. The upper panel represents  $^3R$  while the bottom panel represents  $^5R$ .

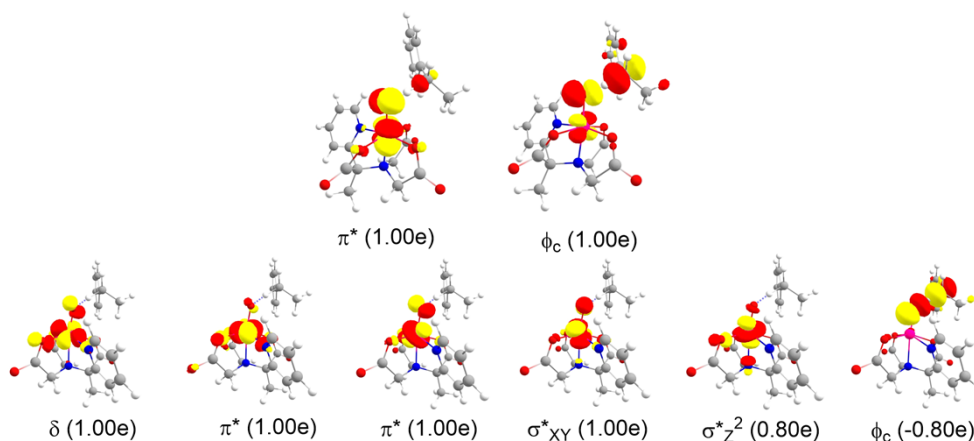

**Fig. S13** Spin natural orbitals and their occupations for the transition states of the reaction between complex 3 and EB. The upper panel represents  $^3R$  while the bottom panel represents  $^5R$ .



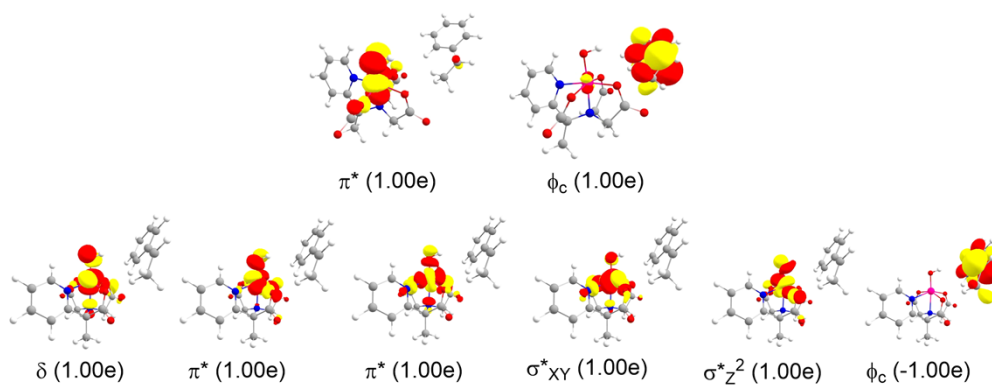

**Fig. S14** Spin natural orbitals and their occupations for the intermediates of the reaction between complex 3 and EB. The upper panel represents  $^3R$  while the bottom panel represents  $^5R$ .

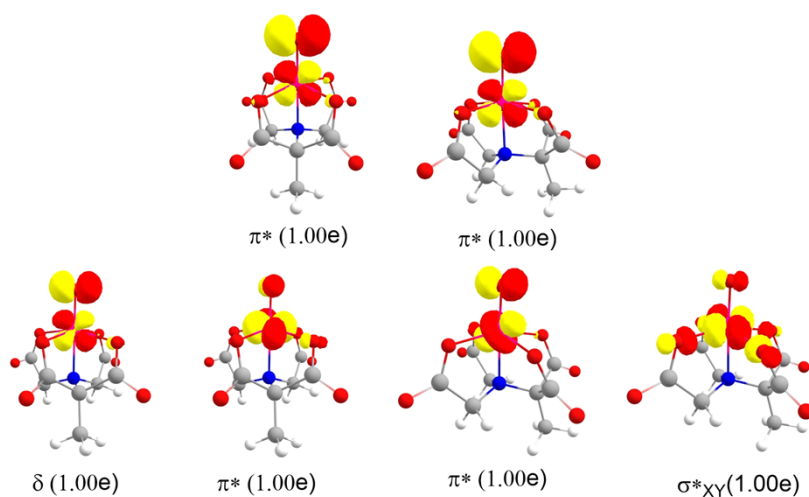

**Fig. S15** Spin natural orbitals and their occupations for the oxidants of complex 4. The upper panel represents  $^3R$  while the bottom panel represents  $^5R$ .

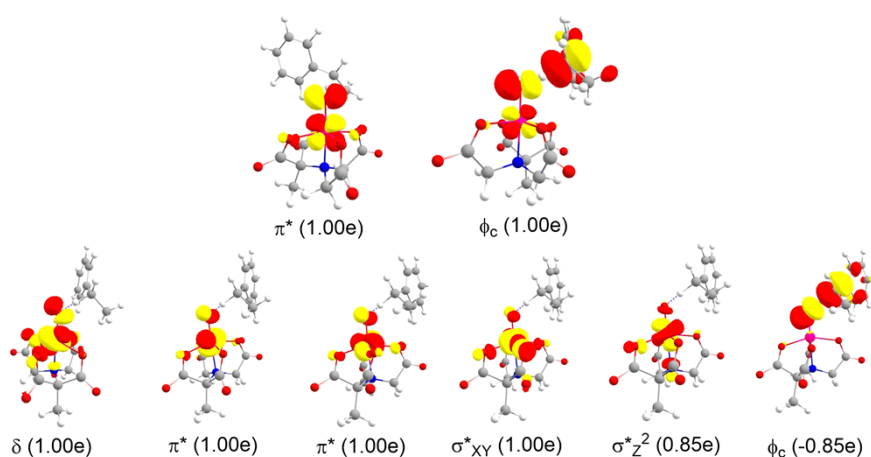

**Fig. S16** Spin natural orbitals and their occupations for the transition states of the reaction between complex 4 and EB. The upper panel represents  $^3R$  while the bottom panel represents  $^5R$ .

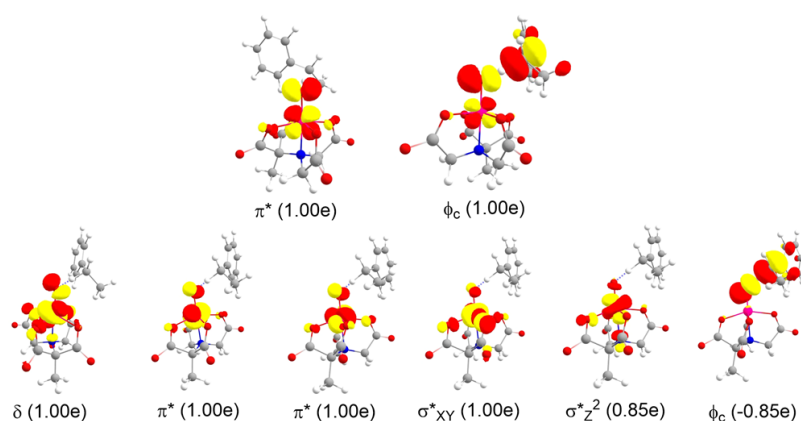

**Fig. S17** Spin natural orbitals and their occupations for the intermediates of the reaction between complex 4 and EB. The upper panel represents  $^3R$  while the bottom panel represents  $^5R$ .

**Table S4** Mulliken spin densities and charges for all the investigated oxidants

| Species | Spin State | Mulliken Spin Density |       |        | Mulliken Charges |        |        |
|---------|------------|-----------------------|-------|--------|------------------|--------|--------|
|         |            | Fe                    | O     | Rest   | Fe               | O      | Rest   |
| 1       | S=1        | 1.152                 | 0.896 | -0.048 | 0.602            | -0.459 | -0.143 |
|         | S=2        | 2.965                 | 0.724 | 0.311  | 0.766            | -0.436 | -0.33  |
| 2       | S=1        | 1.167                 | 0.875 | -0.042 | 0.651            | -0.424 | -0.227 |
|         | S=2        | 2.997                 | 0.618 | 0.385  | 0.814            | -0.422 | -0.392 |
| 3       | S=1        | 1.155                 | 0.881 | -0.036 | 0.654            | -0.419 | 0.765  |
|         | S=2        | 3.014                 | 0.634 | 0.352  | 0.794            | -0.418 | 0.624  |
| 4       | S=1        | 1.156                 | 0.877 | -0.033 | 0.629            | -0.421 | 1.792  |
|         | S=2        | 3.043                 | 0.624 | 0.333  | 0.748            | -0.438 | 1.69   |

**Table S5** Mulliken spin densities and charges of stationary points along S=1 and S=2

| Oxidant | Species | Mulliken Spin Density |       |        |        |       | Mulliken Charges |        |       |        |        |
|---------|---------|-----------------------|-------|--------|--------|-------|------------------|--------|-------|--------|--------|
|         |         | Fe                    | O     | H      | C      | Rest  | Fe               | O      | H     | C      | Rest   |
| 1+EB    | $^3TS$  | 0.935                 | 0.649 | -0.060 | 0.423  | 0.053 | 0.573            | -0.630 | 0.335 | -0.385 | 0.107  |
|         | $^3I$   | 0.933                 | 0.145 | -0.007 | 0.759  | 0.17  | 0.539            | -0.747 | 0.404 | -0.194 | -0.002 |
|         | $^5TS$  | 3.764                 | 0.212 | 0.017  | -0.317 | 0.324 | 0.848            | -0.661 | 0.342 | -0.396 | -0.133 |
|         | $^5I$   | 4.021                 | 0.373 | -0.009 | -0.719 | 0.334 | 0.846            | -0.811 | 0.430 | -0.246 | -0.219 |
| 2+EB    | $^3TS$  | 0.909                 | 0.688 | -0.059 | 0.403  | 0.059 | 0.590            | -0.583 | 0.349 | -0.379 | 0.023  |
|         | $^3I$   | 0.906                 | 0.161 | 0.002  | 0.737  | 0.194 | 0.570            | -0.726 | 0.430 | -0.237 | -0.037 |
|         | $^5TS$  | 3.762                 | 0.043 | 0.032  | -0.264 | 0.427 | 0.897            | -0.623 | 0.320 | -0.376 | -0.218 |
|         | $^5I$   | 4.023                 | 0.338 | -0.005 | -0.729 | 0.373 | 0.902            | -0.816 | 0.429 | -0.247 | -0.268 |
| 1+DHT   | $^3TS$  | 0.931                 | 0.684 | -0.055 | 0.304  | 0.136 | 0.585            | -0.613 | 0.309 | -0.432 | 0.151  |
|         | $^3I$   | 0.929                 | 0.152 | 0.003  | 0.568  | 0.348 | 0.530            | -0.751 | 0.411 | -0.245 | 0.055  |
|         | $^5TS$  | 3.700                 | 0.300 | 0.012  | -0.206 | 0.194 | 0.838            | -0.633 | 0.320 | -0.439 | -0.086 |
|         | $^5I$   | 2.793                 | 0.180 | 0.016  | 0.550  | 0.461 | 0.698            | -0.764 | 0.434 | -0.245 | -0.123 |

|       |                 |       |        |        |        |       |       |        |       |        |        |
|-------|-----------------|-------|--------|--------|--------|-------|-------|--------|-------|--------|--------|
| 2+DHT | <sup>3</sup> TS | 0.911 | 0.720  | -0.055 | 0.294  | 0.13  | 0.590 | -0.563 | 0.326 | -0.439 | 0.086  |
|       | <sup>3</sup> I  | 0.910 | 0.155  | -0.002 | 0.572  | 0.365 | 0.562 | -0.728 | 0.437 | -0.248 | -0.023 |
|       | <sup>5</sup> TS | 3.682 | 0.167  | 0.025  | -0.199 | 0.325 | 0.891 | -0.616 | 0.320 | -0.428 | -0.167 |
|       | <sup>5</sup> I  | 4.018 | 0.343  | 0.000  | -0.572 | 0.211 | 0.882 | -0.823 | 0.429 | -0.185 | -0.303 |
| 3-EB  | <sup>3</sup> TS | 0.952 | 0.634  | -0.073 | 0.445  | 0.042 | 0.625 | -0.602 | 0.385 | -0.374 | 0.966  |
|       | <sup>3</sup> I  | 0.892 | 0.144  | -0.006 | 0.756  | 0.214 | 0.593 | -0.715 | 0.404 | -0.192 | 0.91   |
|       | <sup>5</sup> TS | 3.869 | -0.075 | 0.052  | -0.321 | 0.475 | 0.902 | -0.635 | 0.339 | -0.373 | 0.767  |
|       | <sup>5</sup> I  | 4.043 | 0.346  | 0.002  | -0.757 | 0.366 | 0.901 | -0.804 | 0.410 | -0.185 | 0.678  |
| 4-EB  | <sup>3</sup> TS | 1.014 | 0.582  | -0.078 | 0.445  | 0.037 | 0.621 | -0.606 | 0.408 | -0.371 | 1.948  |
|       | <sup>3</sup> I  | 0.915 | 0.127  | -0.005 | 0.763  | 0.2   | 0.596 | -0.714 | 0.381 | -0.195 | 1.932  |
|       | <sup>5</sup> TS | 3.941 | -0.181 | 0.070  | -0.361 | 0.531 | 0.858 | -0.652 | 0.354 | -0.368 | 1.808  |
|       | <sup>5</sup> I  | 4.069 | 0.290  | 0.003  | -0.760 | 0.398 | 0.855 | -0.802 | 0.394 | -0.195 | 1.748  |

## Cartesian coordinates of all the stationary points and thermochemistry data computed at B1 Level of Theory

### Complex <sup>3</sup>1

Zero-point correction= 0.442934 (Hartree/Particle)  
 Thermal correction to Energy= 0.477905  
 Thermal correction to Enthalpy= 0.478849  
 Thermal correction to Gibbs Free Energy= 0.371654  
 Sum of electronic and zero-point Energies= -2882.53907  
 Sum of electronic and thermal Energies= -2882.504102  
 Sum of electronic and thermal Enthalpies= -2882.503158  
 Sum of electronic and thermal Free Energies= -2882.610

|    |              |              |              |
|----|--------------|--------------|--------------|
| Fe | -0.358296000 | -1.733953000 | 0.141219000  |
| N  | 0.060441000  | 0.276164000  | -0.041588000 |
| N  | 1.129511000  | -1.869236000 | -1.183164000 |
| N  | 1.080662000  | -1.611610000 | 1.518209000  |
| N  | -1.616495000 | -1.370182000 | -1.339579000 |
| N  | -1.674491000 | -1.102638000 | 1.471943000  |
| O  | -0.678774000 | -3.326654000 | 0.285674000  |
| C  | 1.354458000  | -2.851782000 | -2.066223000 |
| C  | 2.428136000  | -2.787609000 | -2.949820000 |
| C  | 3.270552000  | -1.675261000 | -2.908604000 |
| C  | 3.035547000  | -0.654129000 | -1.984065000 |
| C  | 1.947550000  | -0.793208000 | -1.128229000 |
| C  | 1.567739000  | 0.163069000  | -0.006002000 |
| C  | 1.906468000  | -0.565102000 | 1.287521000  |
| C  | 2.966745000  | -0.265780000 | 2.136981000  |
| C  | 3.165167000  | -1.092778000 | 3.245807000  |
| C  | 2.314918000  | -2.177095000 | 3.469452000  |
| C  | 1.270387000  | -2.408344000 | 2.578844000  |
| C  | -2.529854000 | -2.255041000 | -1.788173000 |
| C  | -3.384322000 | -1.949370000 | -2.835054000 |
| C  | -3.297235000 | -0.684959000 | -3.426764000 |
| C  | -2.360575000 | 0.223409000  | -2.952812000 |
| C  | -1.522855000 | -0.148038000 | -1.899227000 |
| C  | -0.475532000 | 0.786550000  | -1.348451000 |
| C  | -0.516022000 | 1.015968000  | 1.131519000  |
| C  | -1.609793000 | 0.207452000  | 1.785588000  |
| C  | -2.506963000 | 0.773853000  | 2.692284000  |
| C  | -3.474894000 | -0.032496000 | 3.277243000  |
| C  | -3.527476000 | -1.390126000 | 2.947828000  |
| C  | -2.613834000 | -1.889697000 | 2.033226000  |
| H  | 0.662663000  | -3.686268000 | -2.036809000 |
| H  | 2.594811000  | -3.597611000 | -3.651881000 |
| H  | 4.111847000  | -1.598760000 | -3.590816000 |
| H  | 3.661138000  | 0.229466000  | -1.913924000 |
| H  | 2.064202000  | 1.131600000  | -0.088747000 |

|    |              |              |              |
|----|--------------|--------------|--------------|
| H  | 3.599060000  | 0.589186000  | 1.921656000  |
| H  | 3.983922000  | -0.887816000 | 3.928930000  |
| H  | 2.453205000  | -2.838587000 | 4.318009000  |
| H  | 0.574605000  | -3.233123000 | 2.685516000  |
| H  | -2.539602000 | -3.212920000 | -1.281013000 |
| H  | -4.109646000 | -2.682954000 | -3.169808000 |
| H  | -3.966821000 | -0.406416000 | -4.234528000 |
| H  | -2.293551000 | 1.227742000  | -3.356693000 |
| H  | -2.480935000 | 1.841703000  | 2.874431000  |
| H  | -4.195088000 | 0.397308000  | 3.966286000  |
| H  | -4.273346000 | -2.049750000 | 3.378002000  |
| H  | -2.597921000 | -2.928652000 | 1.724672000  |
| H  | -0.915114000 | 1.781176000  | -1.213461000 |
| H  | 0.352296000  | 0.884291000  | -2.058299000 |
| H  | -0.910326000 | 1.985132000  | 0.808847000  |
| H  | 0.283555000  | 1.211883000  | 1.853192000  |
| Cl | -3.580301000 | 2.742653000  | -0.185970000 |
| O  | -4.028558000 | 3.124220000  | 1.183247000  |
| O  | -2.184826000 | 3.287126000  | -0.418531000 |
| O  | -4.500954000 | 3.260213000  | -1.223279000 |
| O  | -3.499147000 | 1.236263000  | -0.280046000 |
| Cl | 4.424048000  | 2.384882000  | -0.174355000 |
| O  | 3.565208000  | 2.402205000  | -1.414647000 |
| O  | 5.486618000  | 3.406873000  | -0.255309000 |
| O  | 5.011678000  | 1.003962000  | -0.035597000 |
| O  | 3.529479000  | 2.631251000  | 1.015029000  |

### Complex <sup>5</sup>1

Zero-point correction= 0.440548 (Hartree/Particle)  
 Thermal correction to Energy= 0.476711  
 Thermal correction to Enthalpy= 0.477655  
 Thermal correction to Gibbs Free Energy= 0.365010  
 Sum of electronic and zero-point Energies= -2882.52326  
 Sum of electronic and thermal Energies= -2882.487107  
 Sum of electronic and thermal Enthalpies= -2882.486163  
 Sum of electronic and thermal Free Energies= -2882.598

|    |              |              |              |
|----|--------------|--------------|--------------|
| Fe | 0.427906000  | -1.818066000 | 0.000019000  |
| N  | -0.119954000 | 0.185455000  | -0.000023000 |
| N  | -1.210683000 | -1.838784000 | 1.414822000  |
| N  | -1.210702000 | -1.838878000 | -1.414705000 |
| N  | 1.655405000  | -1.189301000 | 1.547713000  |
| N  | 1.655377000  | -1.189364000 | -1.547750000 |
| O  | 0.856505000  | -3.387258000 | 0.000056000  |
| C  | -1.467874000 | -2.702167000 | 2.406591000  |
| C  | -2.562232000 | -2.530809000 | 3.250345000  |

|    |              |              |              |
|----|--------------|--------------|--------------|
| C  | -3.398903000 | -1.430947000 | 3.049698000  |
| C  | -3.132245000 | -0.530643000 | 2.014994000  |
| C  | -2.018267000 | -0.775627000 | 1.215899000  |
| C  | -1.628672000 | 0.050315000  | 0.000003000  |
| C  | -2.018294000 | -0.775718000 | -1.215823000 |
| C  | -3.132307000 | -0.530808000 | -2.014890000 |
| C  | -3.398993000 | -1.431187000 | -3.049523000 |
| C  | -2.562310000 | -2.531049000 | -3.250128000 |
| C  | -1.467916000 | -2.702334000 | -2.406406000 |
| C  | 2.624668000  | -1.935375000 | 2.114695000  |
| C  | 3.449145000  | -1.427159000 | 3.104737000  |
| C  | 3.269118000  | -0.099599000 | 3.508984000  |
| C  | 2.273910000  | 0.666801000  | 2.916837000  |
| C  | 1.477694000  | 0.091519000  | 1.924611000  |
| C  | 0.380361000  | 0.872218000  | 1.247794000  |
| C  | 0.380316000  | 0.872160000  | -1.247899000 |
| C  | 1.477640000  | 0.091439000  | -1.924694000 |
| C  | 2.273862000  | 0.666711000  | -2.916923000 |
| C  | 3.269097000  | -0.099681000 | -3.509033000 |
| C  | 3.449145000  | -1.427225000 | -3.104745000 |
| C  | 2.624665000  | -1.935430000 | -2.114699000 |
| H  | -0.780247000 | -3.536104000 | 2.506720000  |
| H  | -2.750052000 | -3.246425000 | 4.043869000  |
| H  | -4.258206000 | -1.270707000 | 3.694087000  |
| H  | -3.756413000 | 0.334660000  | 1.817801000  |
| H  | -2.100370000 | 1.032510000  | -0.000032000 |
| H  | -3.756483000 | 0.334497000  | -1.817726000 |
| H  | -4.258323000 | -1.271005000 | -3.693888000 |
| H  | -2.750150000 | -3.246721000 | -4.043596000 |
| H  | -0.780280000 | -3.536267000 | -2.506501000 |
| H  | 2.710774000  | -2.951712000 | 1.745357000  |
| H  | 4.224091000  | -2.050369000 | 3.537612000  |
| H  | 3.914842000  | 0.338636000  | 4.263536000  |
| H  | 2.145646000  | 1.713319000  | 3.170136000  |
| H  | 2.145559000  | 1.713219000  | -3.170257000 |
| H  | 3.914826000  | 0.338547000  | -4.263585000 |
| H  | 4.224112000  | -2.050430000 | -3.537589000 |
| H  | 2.710794000  | -2.951755000 | -1.745331000 |
| H  | 0.762128000  | 1.865703000  | 0.993595000  |
| H  | -0.462499000 | 1.009316000  | 1.932403000  |
| H  | 0.762152000  | 1.865650000  | -0.993774000 |
| H  | -0.462568000 | 1.009235000  | -1.932483000 |
| Cl | 3.611013000  | 2.468159000  | -0.000018000 |
| O  | 4.345272000  | 2.860660000  | -1.229625000 |
| O  | 2.243458000  | 3.121304000  | -0.000662000 |
| O  | 4.344159000  | 2.860763000  | 1.230234000  |
| O  | 3.401163000  | 0.970880000  | -0.000045000 |
| Cl | -4.131305000 | 2.609012000  | -0.000065000 |
| O  | -3.246345000 | 2.608927000  | 1.220294000  |
| O  | -5.033277000 | 3.777767000  | -0.000113000 |
| O  | -4.919057000 | 1.320330000  | -0.000019000 |
| O  | -3.246338000 | 2.608835000  | -1.220419000 |

### Complex 32

Zero-point correction= 0.388768 (Hartree/Particle)  
 Thermal correction to Energy= 0.413339  
 Thermal correction to Enthalpy= 0.414283  
 Thermal correction to Gibbs Free Energy= 0.335167  
 Sum of electronic and zero-point Energies= -1400.10748  
 Sum of electronic and thermal Energies= -1400.082916  
 Sum of electronic and thermal Enthalpies= -1400.081971  
 Sum of electronic and thermal Free Energies= -1400.161  
 Fe -1.412404000 0.720542000 0.607693000  
 O -2.753016000 0.839115000 -0.729806000  
 O -1.044952000 2.572178000 0.451761000  
 C -0.339003000 -1.799603000 -0.110096000

|   |              |              |              |
|---|--------------|--------------|--------------|
| C | -2.466099000 | -2.062735000 | 0.827887000  |
| C | -0.210011000 | -3.176336000 | -0.285057000 |
| C | -2.409747000 | -3.446022000 | 0.671483000  |
| H | -3.313103000 | -1.542785000 | 1.262158000  |
| C | -1.263144000 | -4.005432000 | 0.111669000  |
| H | 0.682276000  | -3.602271000 | -0.726976000 |
| H | -3.246215000 | -4.061811000 | 0.983481000  |
| H | -1.183980000 | -5.080263000 | -0.022621000 |
| C | 0.588112000  | 0.904515000  | 2.830909000  |
| C | 1.242494000  | -0.271273000 | 0.915817000  |
| C | 1.799479000  | 0.629929000  | 3.463171000  |
| H | -0.209734000 | 1.477601000  | 3.290811000  |
| C | 2.462959000  | -0.603228000 | 1.497227000  |
| C | 2.742194000  | -0.141002000 | 2.786833000  |
| H | 1.988264000  | 1.008452000  | 4.461830000  |
| H | 3.189298000  | -1.200888000 | 0.961611000  |
| H | 3.693173000  | -0.382312000 | 3.252640000  |
| N | 0.331615000  | 0.452377000  | 1.599454000  |
| N | -1.449133000 | -1.282230000 | 0.448392000  |
| N | -0.072998000 | 0.450558000  | -0.994855000 |
| O | -2.344713000 | 0.768407000  | 1.938352000  |
| C | 0.637562000  | 1.762618000  | -1.091799000 |
| H | 1.633922000  | 1.680727000  | -0.654117000 |
| H | 0.766640000  | 2.054069000  | -2.136724000 |
| C | -0.081039000 | 2.918910000  | -0.348514000 |
| O | 0.337116000  | 4.050271000  | -0.532905000 |
| C | -0.930855000 | 0.168255000  | -2.180277000 |
| H | -0.913944000 | -0.900755000 | -2.408571000 |
| C | -2.417691000 | 0.557140000  | -1.955931000 |
| O | -3.163640000 | 0.528381000  | -2.920320000 |
| C | 0.723510000  | -0.723970000 | -0.466950000 |
| C | 1.770354000  | -1.316065000 | -1.450157000 |
| C | 2.720312000  | -0.393223000 | -2.247184000 |
| H | 2.355627000  | -2.074645000 | -0.915505000 |
| H | 1.190988000  | -1.874194000 | -2.193962000 |
| C | 3.957067000  | 0.182443000  | -1.531981000 |
| H | 3.079844000  | -0.992639000 | -3.094823000 |
| H | 2.142524000  | 0.419026000  | -2.696160000 |
| C | 5.047709000  | -0.856925000 | -1.242230000 |
| H | 4.383609000  | 0.960618000  | -2.177140000 |
| H | 5.905187000  | -0.398187000 | -0.737918000 |
| H | 4.692646000  | -1.676061000 | -0.603485000 |
| H | 5.411789000  | -1.309870000 | -2.172231000 |
| H | 3.671551000  | 0.692597000  | -0.604232000 |
| H | -0.555591000 | 0.689784000  | -3.064593000 |

### Complex 52

Zero-point correction= 0.387207 (Hartree/Particle)  
 Thermal correction to Energy= 0.412612  
 Thermal correction to Enthalpy= 0.413556  
 Thermal correction to Gibbs Free Energy= 0.331029  
 Sum of electronic and zero-point Energies= -1400.10491  
 Sum of electronic and thermal Energies= -1400.079509  
 Sum of electronic and thermal Enthalpies= -1400.078565  
 Sum of electronic and thermal Free Energies= -1400.161  
 Fe -1.575789000 0.757179000 0.648563000  
 O -2.866380000 0.756297000 -0.818565000  
 O -1.026300000 2.597088000 0.710754000  
 C -0.306369000 -1.805140000 -0.187825000  
 C -2.379860000 -2.245639000 0.790875000  
 C -0.106861000 -3.161682000 -0.447602000  
 C -2.255364000 -3.613521000 0.554972000

|   |              |              |              |
|---|--------------|--------------|--------------|
| H | -3.245318000 | -1.805358000 | 1.275784000  |
| C | -1.098605000 | -4.071709000 | -0.071294000 |
| H | 0.793119000  | -3.513197000 | -0.936499000 |
| H | -3.045231000 | -4.293335000 | 0.855631000  |
| H | -0.962991000 | -5.130592000 | -0.271681000 |
| C | 0.689028000  | 0.651391000  | 2.940665000  |
| C | 1.270355000  | -0.323976000 | 0.905734000  |
| C | 1.921608000  | 0.323803000  | 3.505292000  |
| H | -0.082649000 | 1.184088000  | 3.487897000  |
| C | 2.515625000  | -0.704114000 | 1.404382000  |
| C | 2.841169000  | -0.369777000 | 2.722094000  |
| H | 2.145915000  | 0.604030000  | 4.528920000  |
| H | 3.225575000  | -1.241833000 | 0.789352000  |
| H | 3.809777000  | -0.649429000 | 3.126340000  |
| N | 0.384746000  | 0.322178000  | 1.682988000  |
| N | -1.424187000 | -1.385172000 | 0.427769000  |
| N | -0.128104000 | 0.526730000  | -0.928416000 |
| O | -2.562047000 | 0.727149000  | 1.935495000  |
| C | 0.590335000  | 1.842905000  | -0.943830000 |
| H | 1.609451000  | 1.715465000  | -0.576925000 |
| H | 0.662014000  | 2.220846000  | -1.966056000 |
| C | -0.048332000 | 2.956497000  | -0.074570000 |
| O | 0.433683000  | 4.072166000  | -0.159506000 |
| C | -0.918498000 | 0.283065000  | -2.172199000 |
| H | -0.875002000 | -0.777988000 | -2.431479000 |
| C | -2.426353000 | 0.628079000  | -2.037716000 |
| O | -3.083805000 | 0.688834000  | -3.062199000 |
| C | 0.707501000  | -0.667179000 | -0.491574000 |
| C | 1.741054000  | -1.157464000 | -1.548087000 |
| C | 2.658435000  | -0.167330000 | -2.302548000 |
| H | 2.355265000  | -1.938202000 | -1.083769000 |
| H | 1.157094000  | -1.676587000 | -2.315455000 |
| C | 3.908299000  | 0.373484000  | -1.582025000 |
| H | 3.002670000  | -0.703674000 | -3.197525000 |
| H | 2.061855000  | 0.665743000  | -2.682717000 |
| C | 5.024160000  | -0.665567000 | -1.410872000 |
| H | 4.301482000  | 1.208125000  | -2.175745000 |
| H | 5.889098000  | -0.233635000 | -0.895773000 |
| H | 4.702082000  | -1.540445000 | -0.831422000 |
| H | 5.366671000  | -1.034021000 | -2.385316000 |
| H | 3.646114000  | 0.802243000  | -0.607412000 |
| H | -0.498842000 | 0.835930000  | -3.016238000 |

### Complex 3<sup>3</sup>

Zero-point correction= 0.234387 (Hartree/Particle)  
 Thermal correction to Energy= 0.253195  
 Thermal correction to Enthalpy= 0.254139  
 Thermal correction to Gibbs Free Energy= 0.187681  
 Sum of electronic and zero-point Energies= -1223.30581  
 Sum of electronic and thermal Energies= -1223.287002  
 Sum of electronic and thermal Enthalpies= -1223.286058  
 Sum of electronic and thermal Free Energies= -1223.352

|   |              |              |              |
|---|--------------|--------------|--------------|
| e | 0.540685000  | -0.555876000 | -0.958187000 |
| O | 0.684411000  | -2.170514000 | 0.088146000  |
| O | 2.437811000  | -0.387704000 | -0.970885000 |
| C | -1.714613000 | 0.519591000  | 0.351279000  |
| C | -2.372931000 | -1.284796000 | -0.981789000 |
| C | -3.028389000 | 0.729100000  | 0.773294000  |
| C | -3.705122000 | -1.135062000 | -0.600932000 |
| H | -2.027358000 | -2.043029000 | -1.676668000 |
| C | -4.031368000 | -0.111782000 | 0.289328000  |
| H | -3.258611000 | 1.532585000  | 1.463357000  |

|   |              |              |              |
|---|--------------|--------------|--------------|
| H | -4.462094000 | -1.804608000 | -0.996163000 |
| H | -5.060719000 | 0.032828000  | 0.607276000  |
| C | -0.184414000 | 2.129186000  | -0.663671000 |
| N | -1.422356000 | -0.475377000 | -0.511062000 |
| N | 0.639971000  | 0.418174000  | 0.890695000  |
| O | 0.310089000  | -1.269018000 | -2.401778000 |
| C | 1.985010000  | 1.052150000  | 0.909305000  |
| H | 1.903776000  | 2.093926000  | 0.588617000  |
| H | 2.405577000  | 1.051418000  | 1.919813000  |
| C | 2.976620000  | 0.359448000  | -0.060280000 |
| O | 4.172315000  | 0.592625000  | 0.078430000  |
| C | 0.470023000  | -0.625302000 | 1.932897000  |
| H | -0.528855000 | -0.553121000 | 2.374258000  |
| C | 0.622157000  | -2.065655000 | 1.377100000  |
| O | 0.633538000  | -2.988764000 | 2.185886000  |
| C | -0.506226000 | 1.367565000  | 0.705602000  |
| H | 1.186822000  | -0.483039000 | 2.747263000  |
| O | 0.331287000  | 1.352668000  | -1.545334000 |
| O | -0.459832000 | 3.322131000  | -0.753305000 |
| C | -0.726889000 | 2.337283000  | 1.860295000  |
| H | -1.462647000 | 3.092034000  | 1.572262000  |
| H | -1.059696000 | 1.823458000  | 2.770351000  |
| H | 0.202607000  | 2.868986000  | 2.081218000  |

### Complex 5<sup>3</sup>

Zero-point correction= 0.232956 (Hartree/Particle)  
 Thermal correction to Energy= 0.252545  
 Thermal correction to Enthalpy= 0.253489  
 Thermal correction to Gibbs Free Energy= 0.183788  
 Sum of electronic and zero-point Energies= -1223.30909  
 Sum of electronic and thermal Energies= -1223.289502  
 Sum of electronic and thermal Enthalpies= -1223.288558  
 Sum of electronic and thermal Free Energies= -1223.358

|    |              |              |              |
|----|--------------|--------------|--------------|
| Fe | 0.685039000  | -0.609326000 | -1.025795000 |
| O  | 0.542411000  | -2.233121000 | 0.116967000  |
| O  | 2.637524000  | -0.386361000 | -0.855516000 |
| C  | -1.739152000 | 0.538874000  | 0.313057000  |
| C  | -2.494510000 | -1.235931000 | -0.990885000 |
| C  | -3.033316000 | 0.794303000  | 0.774991000  |
| C  | -3.812806000 | -1.043530000 | -0.578457000 |
| H  | -2.204958000 | -2.021917000 | -1.682085000 |
| C  | -4.078499000 | -0.009923000 | 0.319415000  |
| H  | -3.219223000 | 1.603037000  | 1.472111000  |
| H  | -4.602588000 | -1.688841000 | -0.949817000 |
| H  | -5.092711000 | 0.170250000  | 0.666845000  |
| C  | -0.194584000 | 2.119154000  | -0.732569000 |
| N  | -1.502417000 | -0.460249000 | -0.555088000 |
| N  | 0.645552000  | 0.410343000  | 0.835000000  |
| O  | 0.567999000  | -1.345149000 | -2.467294000 |
| C  | 1.969622000  | 1.086420000  | 0.924787000  |
| H  | 1.892830000  | 2.084447000  | 0.485235000  |
| H  | 2.284475000  | 1.205142000  | 1.966182000  |
| C  | 3.070547000  | 0.342446000  | 0.126634000  |
| O  | 4.239841000  | 0.538833000  | 0.435590000  |
| C  | 0.447446000  | -0.606895000 | 1.905782000  |
| H  | -0.489234000 | -0.419638000 | 2.438763000  |
| C  | 0.410575000  | -2.070843000 | 1.394048000  |
| O  | 0.248378000  | -2.951096000 | 2.233458000  |
| C  | -0.504268000 | 1.364531000  | 0.639315000  |
| H  | 1.250069000  | -0.529988000 | 2.644862000  |
| O  | 0.326232000  | 1.346118000  | -1.613446000 |
| O  | -0.495446000 | 3.305599000  | -0.830885000 |

|   |              |             |             |
|---|--------------|-------------|-------------|
| C | -0.698636000 | 2.347982000 | 1.789681000 |
| H | -1.425376000 | 3.108655000 | 1.495528000 |
| H | -1.034044000 | 1.851516000 | 2.708069000 |
| H | 0.237789000  | 2.871043000 | 1.999799000 |

### Complex <sup>34</sup>

Zero-point correction= 0.166944 (Hartree/Particle)  
 Thermal correction to Energy= 0.183867  
 Thermal correction to Enthalpy= 0.184811  
 Thermal correction to Gibbs Free Energy= 0.122521  
 Sum of electronic and zero-point Energies= -1164.23020  
 Sum of electronic and thermal Energies= -1164.213279  
 Sum of electronic and thermal Enthalpies= -1164.212335  
 Sum of electronic and thermal Free Energies= -1164.274

|    |              |              |              |
|----|--------------|--------------|--------------|
| Fe | -0.518047000 | 0.000283000  | -1.097044000 |
| O  | -1.792781000 | -1.361248000 | -0.508001000 |
| O  | 0.903668000  | -1.382338000 | -1.185469000 |
| O  | 0.904463000  | 1.381952000  | -1.186042000 |
| O  | -1.793183000 | 1.361004000  | -0.507312000 |
| O  | -0.912790000 | 0.000994000  | -2.676068000 |
| N  | 0.084404000  | -0.000252000 | 0.900961000  |
| C  | -1.659654000 | -1.813944000 | 0.688722000  |
| C  | -0.467089000 | -1.238850000 | 1.495295000  |
| C  | -1.659341000 | 1.814013000  | 0.689244000  |
| C  | -0.467274000 | 1.237969000  | 1.495922000  |
| H  | -0.779766000 | -1.075526000 | 2.533669000  |
| H  | 0.308812000  | -2.010175000 | 1.508882000  |
| H  | -0.780643000 | 1.073757000  | 2.533924000  |
| H  | 0.308743000  | 2.009188000  | 1.510621000  |
| O  | -2.355436000 | 2.677073000  | 1.235787000  |
| O  | -2.356438000 | -2.676512000 | 1.235149000  |
| C  | 1.561155000  | -0.000065000 | 0.641159000  |
| C  | 1.813353000  | 1.238836000  | -0.282623000 |
| C  | 1.813167000  | -1.239098000 | -0.282638000 |
| O  | 2.801670000  | -1.958239000 | -0.105514000 |
| O  | 2.801841000  | 1.957916000  | -0.105107000 |
| C  | 2.435600000  | -0.000086000 | 1.885829000  |
| H  | 2.255668000  | -0.894493000 | 2.493760000  |
| H  | 3.482030000  | -0.000225000 | 1.577024000  |
| H  | 2.255935000  | 0.894412000  | 2.493710000  |

### Complex <sup>54</sup>

Zero-point correction= 0.165687 (Hartree/Particle)  
 Thermal correction to Energy= 0.183306  
 Thermal correction to Enthalpy= 0.184250  
 Thermal correction to Gibbs Free Energy= 0.119293  
 Sum of electronic and zero-point Energies= -1164.23652  
 Sum of electronic and thermal Energies= -1164.218900  
 Sum of electronic and thermal Enthalpies= -1164.217956  
 Sum of electronic and thermal Free Energies= -1164.282

|    |              |              |              |
|----|--------------|--------------|--------------|
| Fe | -0.545177000 | -0.000088000 | -1.165734000 |
| O  | -1.830238000 | -1.432170000 | -0.500639000 |
| O  | 0.993026000  | -1.410962000 | -1.199234000 |
| O  | 0.991338000  | 1.411061000  | -1.198966000 |
| O  | -1.830540000 | 1.432648000  | -0.500867000 |
| O  | -0.953014000 | -0.000218000 | -2.739382000 |
| N  | 0.072689000  | -0.000356000 | 0.847595000  |
| C  | -1.688037000 | -1.824990000 | 0.715787000  |
| C  | -0.466291000 | -1.236989000 | 1.467735000  |
| C  | -1.688858000 | 1.824223000  | 0.715953000  |
| C  | -0.467487000 | 1.235756000  | 1.468224000  |

|   |              |              |              |
|---|--------------|--------------|--------------|
| H | -0.733635000 | -1.066048000 | 2.516942000  |
| H | 0.308497000  | -2.009039000 | 1.451986000  |
| H | -0.735740000 | 1.063595000  | 2.516971000  |
| H | 0.307125000  | 2.008008000  | 1.453978000  |
| O | -2.383886000 | 2.648390000  | 1.319874000  |
| O | -2.382813000 | -2.649760000 | 1.319082000  |
| C | 1.564563000  | 0.000295000  | 0.638777000  |
| C | 1.861508000  | 1.246517000  | -0.265482000 |
| C | 1.862727000  | -1.245557000 | -0.265568000 |
| O | 2.858647000  | -1.942578000 | -0.040456000 |
| O | 2.856804000  | 1.944467000  | -0.040701000 |
| C | 2.382652000  | 0.000603000  | 1.922379000  |
| H | 2.180845000  | -0.894042000 | 2.522717000  |
| H | 3.439860000  | 0.001422000  | 1.653693000  |
| H | 2.179579000  | 0.894700000  | 2.523116000  |

### EB

Zero-point correction= 0.157375 (Hartree/Particle)  
 Thermal correction to Energy= 0.164699  
 Thermal correction to Enthalpy= 0.165643  
 Thermal correction to Gibbs Free Energy= 0.125145  
 Sum of electronic and zero-point Energies= -310.722853  
 Sum of electronic and thermal Energies= -310.715528  
 Sum of electronic and thermal Enthalpies= -310.714584  
 Sum of electronic and thermal Free Energies= -310.7550

|   |              |              |              |
|---|--------------|--------------|--------------|
| C | -0.434678000 | 0.000078000  | -0.328435000 |
| C | 0.270520000  | 1.202597000  | -0.184975000 |
| C | 1.637314000  | 1.205767000  | 0.096272000  |
| C | 2.326003000  | -0.000079000 | 0.238545000  |
| C | 1.637171000  | -1.205864000 | 0.096215000  |
| C | 0.270402000  | -1.202541000 | -0.185025000 |
| H | -0.257890000 | 2.147093000  | -0.299391000 |
| H | 2.165348000  | 2.150444000  | 0.199392000  |
| H | 3.391267000  | -0.000175000 | 0.453709000  |
| H | 2.165153000  | -2.150576000 | 0.199279000  |
| H | -0.258157000 | -2.146949000 | -0.299482000 |
| C | -1.926434000 | 0.000186000  | -0.592421000 |
| H | -2.192702000 | 0.879593000  | -1.192454000 |
| H | -2.192781000 | -0.878908000 | -1.192876000 |
| C | -2.763059000 | -0.000126000 | 0.700012000  |
| H | -3.835617000 | -0.000031000 | 0.472856000  |
| H | -2.544056000 | -0.884628000 | 1.308683000  |
| H | -2.543991000 | 0.884029000  | 1.309154000  |

### DHT

Zero-point correction= 0.150555 (Hartree/Particle)  
 Thermal correction to Energy= 0.157305  
 Thermal correction to Enthalpy= 0.158249  
 Thermal correction to Gibbs Free Energy= 0.120110  
 Sum of electronic and zero-point Energies= -272.587920  
 Sum of electronic and thermal Energies= -272.581171  
 Sum of electronic and thermal Enthalpies= -272.580227  
 Sum of electronic and thermal Free Energies= -272.6183

|   |              |              |              |
|---|--------------|--------------|--------------|
| C | 1.277370000  | -1.253007000 | -0.000742000 |
| C | 1.908645000  | 0.112883000  | 0.000698000  |
| C | 1.201662000  | 1.244063000  | 0.000708000  |
| C | -0.303255000 | 1.283307000  | -0.001263000 |
| C | -0.953285000 | -0.083078000 | 0.000003000  |
| C | -0.227648000 | -1.207244000 | 0.000140000  |
| H | 1.633920000  | -1.828132000 | -0.872404000 |
| H | -0.663014000 | 1.861820000  | 0.867422000  |
| H | 1.635014000  | -1.830311000 | 0.868996000  |

|   |              |              |              |
|---|--------------|--------------|--------------|
| H | -0.660787000 | 1.858785000  | -0.872946000 |
| C | -2.459558000 | -0.095094000 | 0.000690000  |
| H | -2.861809000 | 0.426144000  | -0.879767000 |
| H | -2.857322000 | -1.115074000 | 0.001281000  |
| H | -2.861348000 | 0.427112000  | 0.880713000  |
| H | 2.996940000  | 0.153312000  | 0.002124000  |
| H | 1.715049000  | 2.204641000  | 0.002252000  |
| H | -0.740226000 | -2.169271000 | 0.000928000  |

**1+EB**

**<sup>3</sup>TS**

Zero-point correction= 0.594602 (Hartree/Particle)

Thermal correction to Energy= 0.638480

Thermal correction to Enthalpy= 0.639424

Thermal correction to Gibbs Free Energy= 0.509356

Sum of electronic and zero-point Energies= -3193.23398

Sum of electronic and thermal Energies= -3193.190104

Sum of electronic and thermal Enthalpies= -3193.189160

Sum of electronic and thermal Free Energies= -3193.319

|    |              |              |              |
|----|--------------|--------------|--------------|
| Fe | -0.375615000 | -0.897355000 | 0.394900000  |
| N  | 1.095244000  | 0.456784000  | -0.005622000 |
| N  | -0.862759000 | 0.466600000  | 1.778694000  |
| N  | -1.384822000 | 0.240092000  | -0.901548000 |
| N  | 0.982724000  | -1.671560000 | 1.624449000  |
| N  | 0.445122000  | -1.908669000 | -1.102684000 |
| O  | -1.568286000 | -2.123075000 | 0.724249000  |
| C  | -1.463024000 | 0.281992000  | 2.963566000  |
| C  | -1.665398000 | 1.339341000  | 3.845462000  |
| C  | -1.215842000 | 2.611087000  | 3.485658000  |
| C  | -0.572079000 | 2.801319000  | 2.260889000  |
| C  | -0.414634000 | 1.694968000  | 1.430598000  |
| C  | 0.239030000  | 1.706478000  | 0.055888000  |
| C  | -0.874981000 | 1.493228000  | -0.957630000 |
| C  | -1.356119000 | 2.447293000  | -1.847693000 |
| C  | -2.400195000 | 2.074718000  | -2.699025000 |
| C  | -2.919311000 | 0.781543000  | -2.639094000 |
| C  | -2.379772000 | -0.119594000 | -1.724721000 |
| C  | 0.859070000  | -2.856903000 | 2.252711000  |
| C  | 1.857827000  | -3.349654000 | 3.078616000  |
| C  | 3.025015000  | -2.597376000 | 3.244872000  |
| C  | 3.149715000  | -1.381371000 | 2.585266000  |
| C  | 2.100239000  | -0.934940000 | 1.779888000  |
| C  | 2.151163000  | 0.390812000  | 1.062651000  |
| C  | 1.670430000  | 0.179198000  | -1.366869000 |
| C  | 1.420831000  | -1.255569000 | -1.766533000 |
| C  | 2.135644000  | -1.876009000 | -2.792078000 |
| C  | 1.812885000  | -3.182209000 | -3.140905000 |
| C  | 0.788202000  | -3.842926000 | -2.457216000 |
| C  | 0.132197000  | -3.175852000 | -1.433265000 |
| H  | -1.772295000 | -0.732421000 | 3.187560000  |
| H  | -2.159947000 | 1.161600000  | 4.794668000  |
| H  | -1.354336000 | 3.453366000  | 4.156843000  |
| H  | -0.185171000 | 3.765146000  | 1.946433000  |
| H  | 0.807809000  | 2.620499000  | -0.129418000 |
| H  | -0.907552000 | 3.435293000  | -1.867692000 |
| H  | -2.798284000 | 2.795056000  | -3.407470000 |
| H  | -3.734222000 | 0.465014000  | -3.280591000 |
| H  | -2.738561000 | -1.137180000 | -1.628774000 |
| H  | -0.070753000 | -3.382223000 | 2.066089000  |
| H  | 1.728756000  | -4.309133000 | 3.567980000  |
| H  | 3.836079000  | -2.966561000 | 3.864927000  |
| H  | 4.056769000  | -0.791399000 | 2.654768000  |

|    |              |              |              |
|----|--------------|--------------|--------------|
| H  | 2.971829000  | -1.360955000 | -3.250985000 |
| H  | 2.370838000  | -3.687477000 | -3.923186000 |
| H  | 0.514019000  | -4.864745000 | -2.697324000 |
| H  | -0.661030000 | -3.623014000 | -0.844826000 |
| H  | 3.144208000  | 0.537431000  | 0.622977000  |
| H  | 1.982180000  | 1.204711000  | 1.775075000  |
| H  | 2.742276000  | 0.401706000  | -1.375695000 |
| H  | 1.192975000  | 0.847386000  | -2.090610000 |
| Cl | 5.163363000  | -1.122727000 | -0.852810000 |
| O  | 5.263467000  | -1.407826000 | -2.314312000 |
| O  | 4.823636000  | 0.341304000  | -0.659725000 |
| O  | 6.427644000  | -1.443802000 | -0.153086000 |
| O  | 4.030705000  | -1.931081000 | -0.265440000 |
| Cl | 0.545420000  | 5.345002000  | -0.304251000 |
| O  | 1.375801000  | 4.783512000  | 0.823239000  |
| O  | 0.783602000  | 6.794503000  | -0.460287000 |
| O  | -0.903519000 | 5.067487000  | 0.002091000  |
| O  | 0.907254000  | 4.602337000  | -1.565436000 |
| C  | -6.000324000 | -2.493359000 | -1.735158000 |
| C  | -6.563283000 | -1.233550000 | -1.966114000 |
| C  | -6.290211000 | -0.184188000 | -1.083482000 |
| C  | -5.459633000 | -0.393462000 | 0.015126000  |
| C  | -4.891103000 | -1.658546000 | 0.271234000  |
| C  | -5.176775000 | -2.704773000 | -0.631530000 |
| H  | -6.210281000 | -3.314674000 | -2.415089000 |
| H  | -7.213127000 | -1.074143000 | -2.822040000 |
| H  | -6.728991000 | 0.796058000  | -1.248712000 |
| H  | -5.253944000 | 0.426956000  | 0.698755000  |
| H  | -4.751327000 | -3.690157000 | -0.465601000 |
| C  | -4.002129000 | -1.846512000 | 1.436095000  |
| H  | -2.762945000 | -1.849733000 | 1.001934000  |
| H  | -4.011172000 | -0.973790000 | 2.096869000  |
| C  | -4.056807000 | -3.157972000 | 2.203957000  |
| H  | -3.852492000 | -4.019974000 | 1.560921000  |
| H  | -3.312928000 | -3.166773000 | 3.007434000  |
| H  | -5.046476000 | -3.306186000 | 2.657063000  |

**<sup>3</sup>II**

Zero-point correction= 0.597783 (Hartree/Particle)

Thermal correction to Energy= 0.642956

Thermal correction to Enthalpy= 0.643900

Thermal correction to Gibbs Free Energy= 0.509541

Sum of electronic and zero-point Energies= -3193.25929

Sum of electronic and thermal Energies= -3193.214124

Sum of electronic and thermal Enthalpies= -3193.213179

Sum of electronic and thermal Free Energies= -3193.347

|    |              |              |              |
|----|--------------|--------------|--------------|
| Fe | -0.486895000 | -0.764971000 | 0.331001000  |
| N  | 1.165734000  | 0.348626000  | 0.013802000  |
| N  | -0.856126000 | 0.644910000  | 1.696212000  |
| N  | -1.290343000 | 0.518159000  | -0.974867000 |
| N  | 0.665521000  | -1.754691000 | 1.603446000  |
| N  | 0.230580000  | -1.888140000 | -1.129528000 |
| O  | -1.935701000 | -1.801504000 | 0.628598000  |
| C  | -1.573697000 | 0.546520000  | 2.824422000  |
| C  | -1.674570000 | 1.617163000  | 3.708010000  |
| C  | -1.001383000 | 2.803090000  | 3.408844000  |
| C  | -0.248362000 | 2.902874000  | 2.236069000  |
| C  | -0.204875000 | 1.792901000  | 1.397937000  |
| C  | 0.507256000  | 1.714109000  | 0.054214000  |
| C  | -0.591575000 | 1.678466000  | -0.999716000 |
| C  | -0.903931000 | 2.709673000  | -1.878926000 |
| C  | -1.983298000 | 2.520245000  | -2.746622000 |





|    |              |              |              |
|----|--------------|--------------|--------------|
| Cl | -4.001961000 | -3.020783000 | 0.707797000  |
| O  | -4.301696000 | -3.605223000 | 2.044169000  |
| O  | -4.023350000 | -1.509782000 | 0.815615000  |
| O  | -5.004745000 | -3.447393000 | -0.306949000 |
| O  | -2.627591000 | -3.444090000 | 0.268375000  |
| Cl | -2.030521000 | 5.165994000  | 0.645702000  |
| O  | -2.674647000 | 4.401365000  | -0.481441000 |
| O  | -2.788427000 | 6.397543000  | 0.949449000  |
| O  | -0.615177000 | 5.495257000  | 0.234147000  |
| O  | -1.964713000 | 4.263299000  | 1.850153000  |
| C  | 5.974073000  | -1.630517000 | 2.015127000  |
| C  | 5.233616000  | -2.290585000 | 1.038245000  |
| C  | 5.124615000  | -1.772900000 | -0.271103000 |
| C  | 5.778420000  | -0.556505000 | -0.557229000 |
| C  | 6.521615000  | 0.102673000  | 0.419178000  |
| C  | 6.623220000  | -0.429354000 | 1.708844000  |
| H  | 6.054492000  | -2.055132000 | 3.011961000  |
| H  | 4.738295000  | -3.228720000 | 1.277851000  |
| H  | 5.712014000  | -0.129209000 | -1.552796000 |
| H  | 7.026889000  | 1.032754000  | 0.174063000  |
| H  | 7.209073000  | 0.083519000  | 2.466529000  |
| C  | 4.297292000  | -2.485584000 | -1.268368000 |
| H  | 3.136839000  | -2.057909000 | -1.099952000 |
| H  | 4.163199000  | -3.540784000 | -1.004677000 |
| C  | 4.566265000  | -2.292149000 | -2.751710000 |
| H  | 3.843962000  | -2.860545000 | -3.345554000 |
| H  | 4.490774000  | -1.241739000 | -3.052279000 |
| H  | 5.572316000  | -2.643480000 | -3.017386000 |

**<sup>5</sup>H**

Zero-point correction= 0.593665 (Hartree/Particle)  
 Thermal correction to Energy= 0.640541  
 Thermal correction to Enthalpy= 0.641485  
 Thermal correction to Gibbs Free Energy= 0.501927  
 Sum of electronic and zero-point Energies= -3193.24930  
 Sum of electronic and thermal Energies= -3193.202429  
 Sum of electronic and thermal Enthalpies= -3193.201485  
 Sum of electronic and thermal Free Energies= -3193.341

|    |              |              |              |
|----|--------------|--------------|--------------|
| Fe | -0.347644000 | -0.875832000 | 0.526218000  |
| N  | 1.035441000  | 0.774096000  | -0.095510000 |
| N  | -0.809043000 | 0.780512000  | 1.918355000  |
| N  | -1.569440000 | 0.391876000  | -0.827383000 |
| N  | 1.353404000  | -1.288248000 | 1.715070000  |
| N  | 0.558353000  | -1.710192000 | -1.202464000 |
| O  | -1.470673000 | -2.192735000 | 1.055549000  |
| C  | -1.342713000 | 0.692620000  | 3.145605000  |
| C  | -1.554456000 | 1.821148000  | 3.932264000  |
| C  | -1.196484000 | 3.070309000  | 3.420255000  |
| C  | -0.637420000 | 3.164152000  | 2.144290000  |
| C  | -0.457131000 | 1.984460000  | 1.423520000  |
| C  | 0.088247000  | 1.934479000  | 0.002704000  |
| C  | -1.099260000 | 1.654569000  | -0.907463000 |
| C  | -1.693254000 | 2.619192000  | -1.718649000 |
| C  | -2.809273000 | 2.243662000  | -2.469708000 |
| C  | -3.291709000 | 0.936670000  | -2.388081000 |
| C  | -2.640527000 | 0.034000000  | -1.551571000 |
| C  | 1.487991000  | -2.438562000 | 2.404567000  |
| C  | 2.657967000  | -2.757006000 | 3.074921000  |
| C  | 3.729062000  | -1.862839000 | 3.008455000  |
| C  | 3.585887000  | -0.679463000 | 2.293424000  |
| C  | 2.377468000  | -0.417383000 | 1.649386000  |
| C  | 2.166669000  | 0.866152000  | 0.876564000  |

|    |              |              |              |
|----|--------------|--------------|--------------|
| C  | 1.510308000  | 0.529259000  | -1.490417000 |
| C  | 1.406631000  | -0.925634000 | -1.892596000 |
| C  | 2.148243000  | -1.431162000 | -2.959586000 |
| C  | 2.008055000  | -2.769456000 | -3.307655000 |
| C  | 1.121876000  | -3.574434000 | -2.588117000 |
| C  | 0.422635000  | -3.009603000 | -1.533857000 |
| H  | -1.597974000 | -0.306394000 | 3.485755000  |
| H  | -1.987443000 | 1.718473000  | 4.921895000  |
| H  | -1.346863000 | 3.969566000  | 4.010338000  |
| H  | -0.342665000 | 4.111920000  | 1.705678000  |
| H  | 0.578019000  | 2.869882000  | -0.265442000 |
| H  | -1.281176000 | 3.622603000  | -1.748680000 |
| H  | -3.294225000 | 2.970448000  | -3.114850000 |
| H  | -4.158924000 | 0.612379000  | -2.952644000 |
| H  | -2.976957000 | -0.993037000 | -1.450467000 |
| H  | 0.625240000  | -3.096632000 | 2.393301000  |
| H  | 2.738349000  | -3.697710000 | 3.608651000  |
| H  | 4.676403000  | -2.098627000 | 3.481860000  |
| H  | 4.415326000  | 0.008905000  | 2.180917000  |
| H  | 2.865855000  | -0.795028000 | -3.464426000 |
| H  | 2.607538000  | -3.186684000 | -4.109947000 |
| H  | 1.000037000  | -4.627395000 | -2.817773000 |
| H  | -0.260954000 | -3.582197000 | -0.915841000 |
| H  | 3.094388000  | 1.112692000  | 0.356361000  |
| H  | 1.963333000  | 1.683516000  | 1.575972000  |
| H  | 2.549363000  | 0.846584000  | -1.599339000 |
| H  | 0.914282000  | 1.139438000  | -2.176593000 |
| Cl | 4.693637000  | -2.046413000 | -0.690920000 |
| O  | 5.129141000  | -2.548800000 | -2.023241000 |
| O  | 4.340386000  | -0.577916000 | -0.810479000 |
| O  | 5.770276000  | -2.203365000 | 0.325654000  |
| O  | 3.466556000  | -2.793147000 | -0.246225000 |
| Cl | 0.785149000  | 5.419159000  | -0.664699000 |
| O  | 1.589940000  | 4.846056000  | 0.472744000  |
| O  | 1.214451000  | 6.798861000  | -0.973238000 |
| O  | -0.671098000 | 5.387394000  | -0.265054000 |
| O  | 0.956201000  | 4.521136000  | -1.862255000 |
| C  | -5.560034000 | -2.752607000 | -2.030928000 |
| C  | -4.957632000 | -3.225407000 | -0.874659000 |
| C  | -5.085487000 | -2.531473000 | 0.366831000  |
| C  | -5.856324000 | -1.331808000 | 0.365300000  |
| C  | -6.458233000 | -0.869825000 | -0.797312000 |
| C  | -6.317768000 | -1.571437000 | -2.003155000 |
| H  | -5.453464000 | -3.307175000 | -2.959394000 |
| H  | -4.383216000 | -4.148582000 | -0.899771000 |
| H  | -5.988797000 | -0.778868000 | 1.289883000  |
| H  | -7.050097000 | 0.041115000  | -0.767854000 |
| H  | -6.802206000 | -1.210865000 | -2.906079000 |
| C  | -4.460276000 | -3.048892000 | 1.532128000  |
| H  | -2.441677000 | -2.289272000 | 1.042644000  |
| H  | -3.977567000 | -4.020628000 | 1.440180000  |
| C  | -4.559302000 | -2.470077000 | 2.909715000  |
| H  | -3.717361000 | -2.797260000 | 3.528873000  |
| H  | -4.574160000 | -1.373911000 | 2.908341000  |
| H  | -5.477995000 | -2.800126000 | 3.421126000  |

**2+EB**

**<sup>3</sup>TS**

Zero-point correction= 0.540629 (Hartree/Particle)  
 Thermal correction to Energy= 0.573992  
 Thermal correction to Enthalpy= 0.574936  
 Thermal correction to Gibbs Free Energy= 0.473316

Sum of electronic and zero-point Energies= -1710.81314  
 Sum of electronic and thermal Energies= -1710.779778  
 Sum of electronic and thermal Enthalpies= -1710.778834  
 Sum of electronic and thermal Free Energies= -1710.880

|    |              |              |              |
|----|--------------|--------------|--------------|
| Fe | -0.258009000 | -0.623172000 | -0.078868000 |
| O  | -0.498926000 | -2.069743000 | -1.301108000 |
| O  | -1.107354000 | 0.570846000  | -1.310499000 |
| C  | 2.242385000  | -1.321231000 | 0.976563000  |
| C  | 0.603974000  | -2.789097000 | 1.774428000  |
| C  | 3.237855000  | -1.996668000 | 1.680088000  |
| C  | 1.548642000  | -3.515876000 | 2.496352000  |
| H  | -0.455013000 | -3.022887000 | 1.760538000  |
| C  | 2.880453000  | -3.109434000 | 2.447279000  |
| H  | 4.271404000  | -1.676341000 | 1.632942000  |
| H  | 1.240925000  | -4.376581000 | 3.080242000  |
| H  | 3.642776000  | -3.652715000 | 2.998043000  |
| C  | -0.326630000 | 1.761543000  | 1.723671000  |
| C  | 1.768745000  | 1.052949000  | 0.955194000  |
| C  | 0.250736000  | 2.788996000  | 2.468022000  |
| H  | -1.393754000 | 1.569564000  | 1.691052000  |
| C  | 2.411940000  | 2.042761000  | 1.692633000  |
| C  | 1.637493000  | 2.922599000  | 2.455190000  |
| H  | -0.377211000 | 3.458575000  | 3.045697000  |
| H  | 3.490049000  | 2.138043000  | 1.673903000  |
| H  | 2.120635000  | 3.706882000  | 3.030628000  |
| N  | 0.426162000  | 0.923183000  | 1.003852000  |
| N  | 0.958711000  | -1.724271000 | 1.047866000  |
| N  | 1.502415000  | -0.247860000 | -1.082587000 |
| O  | -1.638387000 | -0.908365000 | 0.917468000  |
| C  | 1.200374000  | 0.959056000  | -1.918199000 |
| H  | 1.626889000  | 1.848546000  | -1.451194000 |
| H  | 1.652662000  | 0.863309000  | -2.907869000 |
| C  | -0.317691000 | 1.234514000  | -2.096473000 |
| O  | -0.643850000 | 2.079996000  | -2.916162000 |
| C  | 1.760145000  | -1.464331000 | -1.908651000 |
| H  | 2.503825000  | -2.095551000 | -1.414648000 |
| C  | 0.488600000  | -2.338356000 | -2.102701000 |
| O  | 0.531991000  | -3.227299000 | -2.937769000 |
| C  | 2.433054000  | -0.050527000 | 0.103075000  |
| C  | 3.933058000  | 0.137220000  | -0.249517000 |
| C  | 4.368580000  | 1.098707000  | -1.379038000 |
| H  | 4.475182000  | 0.382678000  | 0.672322000  |
| H  | 4.293682000  | -0.856543000 | -0.537600000 |
| C  | 4.415360000  | 2.609088000  | -1.081054000 |
| H  | 5.383360000  | 0.788030000  | -1.663335000 |
| H  | 3.754996000  | 0.917056000  | -2.265348000 |
| C  | 5.559615000  | 3.023208000  | -0.146691000 |
| H  | 4.541726000  | 3.133957000  | -2.036232000 |
| H  | 5.552523000  | 4.104315000  | 0.030082000  |
| H  | 5.504636000  | 2.531340000  | 0.833124000  |
| H  | 6.532046000  | 2.763443000  | -0.582124000 |
| H  | 3.457892000  | 2.958768000  | -0.676802000 |
| H  | 2.165988000  | -1.192517000 | -2.886390000 |
| C  | -5.139868000 | 2.462331000  | -0.256110000 |
| C  | -4.355757000 | 1.369247000  | -0.614675000 |
| C  | -4.637735000 | 0.079043000  | -0.113114000 |
| C  | -5.726973000 | -0.063965000 | 0.768268000  |
| C  | -6.511519000 | 1.032799000  | 1.124429000  |
| C  | -6.223252000 | 2.301149000  | 0.614766000  |
| H  | -4.909394000 | 3.444511000  | -0.661958000 |
| H  | -3.505825000 | 1.496266000  | -1.280209000 |
| H  | -5.969912000 | -1.043783000 | 1.168943000  |

|   |              |              |              |
|---|--------------|--------------|--------------|
| H | -7.353705000 | 0.895913000  | 1.798741000  |
| H | -6.837638000 | 3.154635000  | 0.890558000  |
| C | -3.765543000 | -1.052330000 | -0.501750000 |
| H | -2.723766000 | -0.948416000 | 0.217944000  |
| H | -3.297535000 | -0.898701000 | -1.476933000 |
| C | -4.233710000 | -2.481075000 | -0.293990000 |
| H | -3.447946000 | -3.173769000 | -0.610165000 |
| H | -4.469384000 | -2.693650000 | 0.755660000  |
| H | -5.134651000 | -2.696679000 | -0.886368000 |

### <sup>3</sup>H

Zero-point correction= 0.544020 (Hartree/Particle)  
 Thermal correction to Energy= 0.578640  
 Thermal correction to Enthalpy= 0.579584  
 Thermal correction to Gibbs Free Energy= 0.473864  
 Sum of electronic and zero-point Energies= -1710.83722  
 Sum of electronic and thermal Energies= -1710.802606  
 Sum of electronic and thermal Enthalpies= -1710.801662  
 Sum of electronic and thermal Free Energies= -1710.907

|    |              |              |              |
|----|--------------|--------------|--------------|
| Fe | -0.201974000 | 0.485900000  | -0.143171000 |
| O  | -0.751947000 | 1.845347000  | 1.082857000  |
| O  | -1.133998000 | -0.823642000 | 0.894246000  |
| C  | 2.345711000  | 1.437237000  | -0.790397000 |
| C  | 0.715678000  | 2.791538000  | -1.785167000 |
| C  | 3.368940000  | 2.228679000  | -1.307915000 |
| C  | 1.687595000  | 3.629203000  | -2.329704000 |
| H  | -0.350898000 | 2.926472000  | -1.929560000 |
| C  | 3.028541000  | 3.340208000  | -2.085276000 |
| H  | 4.408936000  | 1.997717000  | -1.112304000 |
| H  | 1.393670000  | 4.483914000  | -2.929301000 |
| H  | 3.811221000  | 3.973144000  | -2.493247000 |
| C  | 0.192920000  | -1.761747000 | -2.069449000 |
| C  | 2.082229000  | -0.961225000 | -0.940189000 |
| C  | 0.958201000  | -2.695784000 | -2.766371000 |
| H  | -0.876441000 | -1.637051000 | -2.201665000 |
| C  | 2.907704000  | -1.855069000 | -1.615573000 |
| C  | 2.331737000  | -2.736160000 | -2.536509000 |
| H  | 0.483258000  | -3.365881000 | -3.474738000 |
| H  | 3.974289000  | -1.875434000 | -1.431826000 |
| H  | 2.958155000  | -3.447129000 | -3.067321000 |
| N  | 0.756605000  | -0.925624000 | -1.192169000 |
| N  | 1.055806000  | 1.732162000  | -1.044627000 |
| N  | 1.404431000  | 0.199806000  | 1.088888000  |
| O  | -1.504524000 | 0.712971000  | -1.343461000 |
| C  | 1.084742000  | -1.070178000 | 1.820287000  |
| H  | 1.633257000  | -1.900806000 | 1.372378000  |
| H  | 1.394482000  | -0.999944000 | 2.865177000  |
| C  | -0.420490000 | -1.453352000 | 1.776782000  |
| O  | -0.798752000 | -2.339850000 | 2.526574000  |
| C  | 1.434364000  | 1.385384000  | 1.997616000  |
| H  | 2.178995000  | 2.102578000  | 1.641739000  |
| C  | 0.074479000  | 2.138161000  | 2.043466000  |
| O  | -0.088776000 | 2.969047000  | 2.921626000  |
| C  | 2.516343000  | 0.141141000  | 0.050475000  |
| C  | 3.957214000  | 0.054106000  | 0.619097000  |
| C  | 4.301266000  | -0.931041000 | 1.759654000  |
| H  | 4.648359000  | -0.097178000 | -0.219551000 |
| H  | 4.184648000  | 1.056016000  | 1.000125000  |
| C  | 4.516151000  | -2.415200000 | 1.408576000  |
| H  | 5.233971000  | -0.559951000 | 2.206177000  |
| H  | 3.551495000  | -0.844660000 | 2.550492000  |
| C  | 5.816474000  | -2.690873000 | 0.642419000  |

|   |              |              |              |
|---|--------------|--------------|--------------|
| H | 4.542386000  | -2.980177000 | 2.348728000  |
| H | 5.924408000  | -3.758183000 | 0.420492000  |
| H | 5.867566000  | -2.151587000 | -0.312351000 |
| H | 6.688819000  | -2.383527000 | 1.231660000  |
| H | 3.661207000  | -2.813291000 | 0.849064000  |
| H | 1.723924000  | 1.092823000  | 3.009964000  |
| C | -5.386974000 | -2.469425000 | -0.140587000 |
| C | -4.581055000 | -1.466982000 | 0.376892000  |
| C | -4.942273000 | -0.090512000 | 0.246960000  |
| C | -6.158952000 | 0.203000000  | -0.436361000 |
| C | -6.955479000 | -0.811862000 | -0.949813000 |
| C | -6.580758000 | -2.154851000 | -0.808269000 |
| H | -5.090317000 | -3.509194000 | -0.023265000 |
| H | -3.652404000 | -1.712333000 | 0.885733000  |
| H | -6.471019000 | 1.237364000  | -0.548367000 |
| H | -7.880954000 | -0.560084000 | -1.462962000 |
| H | -7.210385000 | -2.944494000 | -1.209836000 |
| C | -4.098341000 | 0.909964000  | 0.793459000  |
| H | -2.352315000 | 0.688889000  | -0.857917000 |
| H | -3.222098000 | 0.574995000  | 1.341476000  |
| C | -4.352799000 | 2.384784000  | 0.756422000  |
| H | -3.420746000 | 2.927148000  | 0.941722000  |
| H | -4.765906000 | 2.720514000  | -0.204185000 |
| H | -5.071169000 | 2.695697000  | 1.533374000  |

### <sup>5</sup>TS

Zero-point correction= 0.539097 (Hartree/Particle)  
 Thermal correction to Energy= 0.573667  
 Thermal correction to Enthalpy= 0.574612  
 Thermal correction to Gibbs Free Energy= 0.468304  
 Sum of electronic and zero-point Energies= -1710.81441  
 Sum of electronic and thermal Energies= -1710.779843  
 Sum of electronic and thermal Enthalpies= -1710.778899  
 Sum of electronic and thermal Free Energies= -1710.885

|    |              |              |              |
|----|--------------|--------------|--------------|
| Fe | 0.327158000  | -1.144446000 | 0.497723000  |
| O  | -0.387168000 | -2.645563000 | 1.502298000  |
| O  | 0.901316000  | 0.008465000  | 1.967943000  |
| C  | -2.156182000 | -1.038372000 | -1.263021000 |
| C  | -0.776179000 | -2.803395000 | -1.916533000 |
| C  | -3.101987000 | -1.387018000 | -2.229871000 |
| C  | -1.678487000 | -3.216656000 | -2.894578000 |
| H  | 0.167224000  | -3.308183000 | -1.735832000 |
| C  | -2.856792000 | -2.491087000 | -3.049931000 |
| H  | -4.017635000 | -0.821800000 | -2.347658000 |
| H  | -1.457273000 | -4.080651000 | -3.512000000 |
| H  | -3.586801000 | -2.777848000 | -3.801505000 |
| C  | 1.074354000  | 1.497450000  | -1.186949000 |
| C  | -1.214289000 | 1.165229000  | -0.903512000 |
| C  | 0.864504000  | 2.643164000  | -1.954302000 |
| H  | 2.069633000  | 1.130752000  | -0.957478000 |
| C  | -1.503542000 | 2.286116000  | -1.680993000 |
| C  | -0.447068000 | 3.034439000  | -2.207544000 |
| H  | 1.711010000  | 3.201907000  | -2.338598000 |
| H  | -2.526179000 | 2.583311000  | -1.873077000 |
| H  | -0.655564000 | 3.916043000  | -2.807082000 |
| N  | 0.058807000  | 0.786149000  | -0.688577000 |
| N  | -1.020695000 | -1.744937000 | -1.136607000 |
| N  | -1.727852000 | -0.256050000 | 1.025452000  |
| O  | 1.764333000  | -1.721700000 | -0.254837000 |
| C  | -1.389096000 | 0.829062000  | 1.989951000  |
| H  | -1.563491000 | 1.805444000  | 1.535449000  |
| H  | -2.037968000 | 0.772022000  | 2.868671000  |

|   |              |              |              |
|---|--------------|--------------|--------------|
| C | 0.075349000  | 0.856844000  | 2.504933000  |
| O | 0.344631000  | 1.694073000  | 3.352506000  |
| C | -2.463838000 | -1.389518000 | 1.640430000  |
| H | -3.212230000 | -1.771192000 | 0.939681000  |
| C | -1.582288000 | -2.610230000 | 2.023074000  |
| O | -2.086771000 | -3.466597000 | 2.729863000  |
| C | -2.258770000 | 0.190243000  | -0.310218000 |
| C | -3.732725000 | 0.700243000  | -0.285242000 |
| C | -4.222950000 | 1.677016000  | 0.808257000  |
| H | -3.979908000 | 1.105895000  | -1.273621000 |
| H | -4.351692000 | -0.197921000 | -0.185165000 |
| C | -3.893808000 | 3.174800000  | 0.660429000  |
| H | -5.317717000 | 1.582925000  | 0.825430000  |
| H | -3.891041000 | 1.321084000  | 1.786880000  |
| C | -4.691107000 | 3.879456000  | -0.444920000 |
| H | -4.121820000 | 3.663700000  | 1.615956000  |
| H | -4.424188000 | 4.940098000  | -0.508917000 |
| H | -4.519515000 | 3.438926000  | -1.435498000 |
| H | -5.768354000 | 3.818307000  | -0.248318000 |
| H | -2.820009000 | 3.327071000  | 0.499527000  |
| H | -3.008307000 | -1.067134000 | 2.532953000  |
| C | 4.302168000  | 2.197267000  | 0.948945000  |
| C | 4.061275000  | 0.825947000  | 0.995408000  |
| C | 4.618172000  | -0.040246000 | 0.030110000  |
| C | 5.408236000  | 0.521128000  | -0.989697000 |
| C | 5.653205000  | 1.894540000  | -1.031579000 |
| C | 5.103087000  | 2.738119000  | -0.062947000 |
| H | 3.860554000  | 2.841977000  | 1.704064000  |
| H | 3.406468000  | 0.421342000  | 1.763000000  |
| H | 5.850359000  | -0.120511000 | -1.745960000 |
| H | 6.280203000  | 2.305241000  | -1.819226000 |
| H | 5.298025000  | 3.807099000  | -0.094853000 |
| C | 4.315015000  | -1.498366000 | 0.108395000  |
| H | 3.145866000  | -1.604589000 | -0.136532000 |
| H | 4.314307000  | -1.842464000 | 1.149545000  |
| C | 5.063300000  | -2.459201000 | -0.801840000 |
| H | 4.709178000  | -3.482164000 | -0.641551000 |
| H | 4.917799000  | -2.218937000 | -1.861076000 |
| H | 6.143076000  | -2.441569000 | -0.599603000 |

### <sup>5</sup>IH

Zero-point correction= 0.540975 (Hartree/Particle)  
 Thermal correction to Energy= 0.576946  
 Thermal correction to Enthalpy= 0.577890  
 Thermal correction to Gibbs Free Energy= 0.467619  
 Sum of electronic and zero-point Energies= -1710.84645  
 Sum of electronic and thermal Energies= -1710.810487  
 Sum of electronic and thermal Enthalpies= -1710.809543  
 Sum of electronic and thermal Free Energies= -1710.919

|    |              |              |              |
|----|--------------|--------------|--------------|
| Fe | 0.352791000  | -1.191681000 | 0.108952000  |
| O  | -0.221800000 | -2.775728000 | 1.077734000  |
| O  | 1.107533000  | -0.203493000 | 1.590774000  |
| C  | -2.396089000 | -0.913668000 | -1.233388000 |
| C  | -1.112743000 | -2.546910000 | -2.298245000 |
| C  | -3.470952000 | -1.164284000 | -2.089204000 |
| C  | -2.144464000 | -2.857126000 | -3.182406000 |
| H  | -0.146772000 | -3.041976000 | -2.323847000 |
| C  | -3.339279000 | -2.150915000 | -3.069941000 |
| H  | -4.398238000 | -0.612611000 | -2.002050000 |
| H  | -2.008288000 | -3.628250000 | -3.933015000 |
| H  | -4.169326000 | -2.360902000 | -3.738519000 |
| C  | 0.795843000  | 1.673633000  | -1.333737000 |

|   |              |              |              |
|---|--------------|--------------|--------------|
| C | -1.422867000 | 1.253981000  | -0.762241000 |
| C | 0.465062000  | 2.887565000  | -1.935413000 |
| H | 1.818244000  | 1.312095000  | -1.289461000 |
| C | -1.834030000 | 2.443038000  | -1.364121000 |
| C | -0.873562000 | 3.269240000  | -1.953802000 |
| H | 1.239672000  | 3.505501000  | -2.376735000 |
| H | -2.876813000 | 2.732260000  | -1.374064000 |
| H | -1.176112000 | 4.203070000  | -2.419130000 |
| N | -0.128846000 | 0.886869000  | -0.774099000 |
| N | -1.251293000 | -1.603458000 | -1.361077000 |
| N | -1.638748000 | -0.385400000 | 1.043480000  |
| O | 1.718501000  | -1.628781000 | -1.027184000 |
| C | -1.146795000 | 0.589211000  | 2.056612000  |
| H | -1.433587000 | 1.605488000  | 1.783675000  |
| H | -1.610049000 | 0.385902000  | 3.027291000  |
| C | 0.385859000  | 0.629261000  | 2.288003000  |
| O | 0.812504000  | 1.443113000  | 3.091318000  |
| C | -2.265330000 | -1.592928000 | 1.632527000  |
| H | -3.068643000 | -1.946335000 | 0.978801000  |
| C | -1.304274000 | -2.800608000 | 1.806525000  |
| O | -1.654592000 | -3.701927000 | 2.549179000  |
| C | -2.362117000 | 0.194680000  | -0.136517000 |
| C | -3.818820000 | 0.664267000  | 0.165148000  |
| C | -4.140275000 | 1.500318000  | 1.425104000  |
| H | -4.216399000 | 1.172811000  | -0.721195000 |
| H | -4.409333000 | -0.254218000 | 0.253793000  |
| C | -3.846388000 | 3.012469000  | 1.398943000  |
| H | -5.218425000 | 1.379378000  | 1.599813000  |
| H | -3.658411000 | 1.045065000  | 2.294494000  |
| C | -4.807979000 | 3.816352000  | 0.514036000  |
| H | -3.927342000 | 3.387789000  | 2.426893000  |
| H | -4.560645000 | 4.883493000  | 0.530970000  |
| H | -4.786836000 | 3.492578000  | -0.534467000 |
| H | -5.842037000 | 3.708407000  | 0.863183000  |
| H | -2.811127000 | 3.206132000  | 1.093910000  |
| H | -2.723561000 | -1.373861000 | 2.602086000  |
| C | 4.478512000  | 2.484898000  | 0.178886000  |
| C | 4.114993000  | 1.243894000  | 0.681684000  |
| C | 4.775714000  | 0.051751000  | 0.249513000  |
| C | 5.816928000  | 0.196253000  | -0.714230000 |
| C | 6.166755000  | 1.444885000  | -1.210349000 |
| C | 5.504381000  | 2.599657000  | -0.772016000 |
| H | 3.967678000  | 3.375997000  | 0.536293000  |
| H | 3.319777000  | 1.162062000  | 1.418095000  |
| H | 6.350790000  | -0.682985000 | -1.061812000 |
| H | 6.966992000  | 1.525434000  | -1.942197000 |
| H | 5.788867000  | 3.574394000  | -1.159191000 |
| C | 4.379006000  | -1.199806000 | 0.789257000  |
| H | 2.615933000  | -1.507063000 | -0.665654000 |
| H | 3.598711000  | -1.177127000 | 1.546762000  |
| C | 5.015692000  | -2.525150000 | 0.505054000  |
| H | 4.286065000  | -3.335479000 | 0.614510000  |
| H | 5.441996000  | -2.589586000 | -0.502364000 |
| H | 5.833011000  | -2.739040000 | 1.213594000  |

**1+DHT  
3TS**

Zero-point correction= 0.588224 (Hartree/Particle)  
 Thermal correction to Energy= 0.631440  
 Thermal correction to Enthalpy= 0.632385  
 Thermal correction to Gibbs Free Energy= 0.505275  
 Sum of electronic and zero-point Energies= -3155.10786

|                                                        |              |              |              |
|--------------------------------------------------------|--------------|--------------|--------------|
| Sum of electronic and thermal Energies= -3155.064646   |              |              |              |
| Sum of electronic and thermal Enthalpies= -3155.063702 |              |              |              |
| Sum of electronic and thermal Free Energies= -3155.190 |              |              |              |
| Fe                                                     | 0.414503000  | -0.977867000 | 0.265958000  |
| N                                                      | -0.926351000 | 0.530891000  | -0.052934000 |
| N                                                      | 1.492534000  | 0.081043000  | -1.041153000 |
| N                                                      | 1.080526000  | 0.294565000  | 1.656345000  |
| N                                                      | -0.551638000 | -1.853000000 | -1.235168000 |
| N                                                      | -0.975080000 | -1.647338000 | -1.516791000 |
| O                                                      | 1.488977000  | -2.305557000 | 0.526264000  |
| C                                                      | 2.418154000  | -0.360721000 | -1.904164000 |
| C                                                      | 3.002118000  | 0.496238000  | -2.833092000 |
| C                                                      | 2.610204000  | 1.835285000  | -2.857012000 |
| C                                                      | 1.645220000  | 2.295202000  | -1.957452000 |
| C                                                      | 1.106656000  | 1.377819000  | -1.060623000 |
| C                                                      | 0.057744000  | 1.682602000  | -0.000326000 |
| C                                                      | 0.754325000  | 1.570996000  | 1.348971000  |
| C                                                      | 1.055027000  | 2.634056000  | 2.196094000  |
| C                                                      | 1.712991000  | 2.346582000  | 3.394130000  |
| C                                                      | 2.037810000  | 1.026125000  | 3.711038000  |
| C                                                      | 1.697900000  | 0.017655000  | 2.813949000  |
| C                                                      | -0.374201000 | -3.132078000 | -1.618733000 |
| C                                                      | -1.102059000 | -3.687812000 | -2.659754000 |
| C                                                      | -2.053055000 | -2.896809000 | -3.312158000 |
| C                                                      | -2.237391000 | -1.581662000 | -2.905217000 |
| C                                                      | -1.460339000 | -1.078483000 | -1.859933000 |
| C                                                      | -1.581248000 | 0.351132000  | -1.393721000 |
| C                                                      | -1.938339000 | 0.541266000  | 1.058252000  |
| C                                                      | -2.019567000 | -0.816953000 | 1.713672000  |
| C                                                      | -3.101356000 | -1.194882000 | 2.510305000  |
| C                                                      | -3.081505000 | -2.442694000 | 3.122407000  |
| C                                                      | -1.986340000 | -3.288355000 | 2.923663000  |
| C                                                      | -0.953795000 | -2.859567000 | 2.102831000  |
| H                                                      | 2.681385000  | -1.409717000 | -1.827166000 |
| H                                                      | 3.746754000  | 0.113420000  | -3.523135000 |
| H                                                      | 3.046227000  | 2.523182000  | -3.575284000 |
| H                                                      | 1.296836000  | 3.323063000  | -1.946622000 |
| H                                                      | -0.417157000 | 2.655640000  | -0.145653000 |
| H                                                      | 0.763002000  | 3.640821000  | 1.915302000  |
| H                                                      | 1.960435000  | 3.152572000  | 4.078409000  |
| H                                                      | 2.541182000  | 0.774448000  | 4.638647000  |
| H                                                      | 1.910801000  | -1.029022000 | 3.000339000  |
| H                                                      | 0.375250000  | -3.680716000 | -1.059816000 |
| H                                                      | -0.936618000 | -4.722061000 | -2.942067000 |
| H                                                      | -2.657120000 | -3.308713000 | -4.114691000 |
| H                                                      | -2.994324000 | -0.951196000 | -3.358219000 |
| H                                                      | -3.966679000 | -0.546102000 | 2.583399000  |
| H                                                      | -3.923041000 | -2.761513000 | 3.729629000  |
| H                                                      | -1.940136000 | -4.272080000 | 3.378738000  |
| H                                                      | -0.078843000 | -3.461597000 | 1.884677000  |
| H                                                      | -2.637963000 | 0.636313000  | -1.340264000 |
| H                                                      | -1.096321000 | 1.017231000  | -2.114638000 |
| H                                                      | -2.918195000 | 0.842973000  | 0.674128000  |
| H                                                      | -1.635791000 | 1.286908000  | 1.800447000  |
| Cl                                                     | -5.215654000 | -0.579096000 | -0.424005000 |
| O                                                      | -5.820757000 | -0.611413000 | 0.939893000  |
| O                                                      | -4.650751000 | 0.803779000  | -0.678548000 |
| O                                                      | -6.213341000 | -0.915796000 | -1.464391000 |
| O                                                      | -4.064457000 | -1.555224000 | -0.480208000 |
| Cl                                                     | 0.155394000  | 5.343858000  | -0.288859000 |
| O                                                      | -0.336708000 | 4.682804000  | -1.551737000 |
| O                                                      | 0.087812000  | 6.814936000  | -0.404973000 |

|   |              |              |              |
|---|--------------|--------------|--------------|
| O | 1.570327000  | 4.887781000  | -0.043692000 |
| O | -0.696615000 | 4.856367000  | 0.856315000  |
| C | 5.996026000  | -1.502523000 | -1.090076000 |
| C | 5.550246000  | -0.549656000 | -0.020133000 |
| C | 4.674984000  | -0.900356000 | 0.939450000  |
| C | 4.042559000  | -2.229914000 | 0.990422000  |
| C | 4.553562000  | -3.237594000 | 0.028779000  |
| C | 5.422847000  | -2.883640000 | -0.940515000 |
| H | 5.748360000  | -1.091026000 | -2.085475000 |
| H | 3.922019000  | -2.624711000 | 2.008546000  |
| H | 7.098477000  | -1.557818000 | -1.100944000 |
| H | 2.799403000  | -2.126406000 | 0.722456000  |
| C | 4.040229000  | -4.647076000 | 0.176572000  |
| H | 2.944049000  | -4.664067000 | 0.146829000  |
| H | 4.421827000  | -5.302571000 | -0.612363000 |
| H | 4.338415000  | -5.072399000 | 1.144574000  |
| H | 5.985136000  | 0.447444000  | -0.025116000 |
| H | 4.404694000  | -0.181547000 | 1.709700000  |
| H | 5.773027000  | -3.636820000 | -1.644882000 |

### <sup>3</sup>IH

Zero-point correction= 0.591455 (Hartree/Particle)

Thermal correction to Energy= 0.635835

Thermal correction to Enthalpy= 0.636779

Thermal correction to Gibbs Free Energy= 0.504719

Sum of electronic and zero-point Energies= -3155.14477

Sum of electronic and thermal Energies= -3155.100398

Sum of electronic and thermal Enthalpies= -3155.099454

Sum of electronic and thermal Free Energies= -3155.231

|    |              |              |              |
|----|--------------|--------------|--------------|
| Fe | 0.342401000  | -1.004329000 | 0.237151000  |
| N  | -0.984541000 | 0.491558000  | -0.048494000 |
| N  | 1.418893000  | 0.048475000  | -1.077711000 |
| N  | 1.066830000  | 0.256121000  | 1.605452000  |
| N  | -0.649655000 | -1.894805000 | -1.228191000 |
| N  | -1.008209000 | -1.693617000 | 1.507775000  |
| O  | 1.490410000  | -2.372309000 | 0.494005000  |
| C  | 2.349253000  | -0.387713000 | -1.938796000 |
| C  | 2.935319000  | 0.474293000  | -2.861993000 |
| C  | 2.533981000  | 1.810767000  | -2.886997000 |
| C  | 1.564086000  | 2.265065000  | -1.989519000 |
| C  | 1.029718000  | 1.344986000  | -1.093112000 |
| C  | -0.003142000 | 1.647915000  | -0.015466000 |
| C  | 0.727136000  | 1.533871000  | 1.316367000  |
| C  | 1.056451000  | 2.592176000  | 2.157677000  |
| C  | 1.762785000  | 2.298343000  | 3.326903000  |
| C  | 2.109408000  | 0.978217000  | 3.619788000  |
| C  | 1.736935000  | -0.026563000 | 2.731541000  |
| C  | -0.481356000 | -3.177571000 | -1.600882000 |
| C  | -1.238873000 | -3.741850000 | -2.616486000 |
| C  | -2.206819000 | -2.955872000 | -3.249801000 |
| C  | -2.379831000 | -1.635599000 | -2.852443000 |
| C  | -1.573118000 | -1.123547000 | -1.834966000 |
| C  | -1.669870000 | 0.310845000  | -1.377097000 |
| C  | -1.975756000 | 0.497055000  | 1.085023000  |
| C  | -2.052376000 | -0.868407000 | 1.726657000  |
| C  | -3.121928000 | -1.258603000 | 2.533053000  |
| C  | -3.085068000 | -2.512254000 | 3.133874000  |
| C  | -1.987961000 | -3.350216000 | 2.914165000  |
| C  | -0.968730000 | -2.910187000 | 2.081870000  |
| H  | 2.619438000  | -1.435178000 | -1.863560000 |
| H  | 3.686172000  | 0.096164000  | -3.547739000 |

|    |              |              |              |
|----|--------------|--------------|--------------|
| H  | 2.968912000  | 2.502011000  | -3.602672000 |
| H  | 1.212353000  | 3.291792000  | -1.976847000 |
| H  | -0.484143000 | 2.619343000  | -0.150523000 |
| H  | 0.752317000  | 3.600063000  | 1.894305000  |
| H  | 2.034130000  | 3.100807000  | 4.006244000  |
| H  | 2.654706000  | 0.723906000  | 4.522606000  |
| H  | 1.964268000  | -1.073672000 | 2.898997000  |
| H  | 0.284288000  | -3.718597000 | -1.056523000 |
| H  | -1.082866000 | -4.778899000 | -2.893814000 |
| H  | -2.832997000 | -3.375384000 | -4.031170000 |
| H  | -3.148298000 | -1.009498000 | -3.291541000 |
| H  | -3.990040000 | -0.615470000 | 2.623266000  |
| H  | -3.916080000 | -2.841028000 | 3.750271000  |
| H  | -1.930410000 | -4.336667000 | 3.361980000  |
| H  | -0.091389000 | -3.502401000 | 1.846753000  |
| H  | -2.720946000 | 0.612059000  | -1.302855000 |
| H  | -1.188518000 | 0.966368000  | -2.109903000 |
| H  | -2.958972000 | 0.814336000  | 0.722742000  |
| H  | -1.648406000 | 1.231027000  | 1.828217000  |
| Cl | -5.306273000 | -0.521083000 | -0.329990000 |
| O  | -5.864272000 | -0.543274000 | 1.054354000  |
| O  | -4.706825000 | 0.845264000  | -0.595810000 |
| O  | -6.349597000 | -0.819277000 | -1.336245000 |
| O  | -4.188418000 | -1.531761000 | -0.431292000 |
| Cl | 0.093739000  | 5.303445000  | -0.298764000 |
| O  | -0.421227000 | 4.637981000  | -1.550556000 |
| O  | 0.015011000  | 6.773755000  | -0.414705000 |
| O  | 1.516055000  | 4.855446000  | -0.083561000 |
| O  | -0.731200000 | 4.811578000  | 0.864255000  |
| C  | 6.192224000  | -0.981860000 | -0.952242000 |
| C  | 5.976468000  | -0.446376000 | 0.432871000  |
| C  | 5.310779000  | -1.169578000 | 1.383796000  |
| C  | 4.777162000  | -2.453371000 | 1.100942000  |
| C  | 4.921489000  | -3.033171000 | -0.199560000 |
| C  | 5.582157000  | -2.337415000 | -1.176148000 |
| H  | 5.807254000  | -0.260573000 | -1.698535000 |
| H  | 4.291626000  | -3.025706000 | 1.887358000  |
| H  | 7.276441000  | -1.017420000 | -1.175906000 |
| H  | 2.410995000  | -2.061945000 | 0.575010000  |
| C  | 4.335713000  | -4.403102000 | -0.457169000 |
| H  | 3.252827000  | -4.399502000 | -0.281401000 |
| H  | 4.517081000  | -4.731705000 | -1.485274000 |
| H  | 4.771126000  | -5.151156000 | 0.217079000  |
| H  | 6.381124000  | 0.534499000  | 0.667778000  |
| H  | 5.191630000  | -0.758440000 | 2.383980000  |
| H  | 5.706902000  | -2.781769000 | -2.161910000 |

### <sup>5</sup>TS

Zero-point correction= 0.585789 (Hartree/Particle)

Thermal correction to Energy= 0.630525

Thermal correction to Enthalpy= 0.631469

Thermal correction to Gibbs Free Energy= 0.499388

Sum of electronic and zero-point Energies= -3155.10240

Sum of electronic and thermal Energies= -3155.057666

Sum of electronic and thermal Enthalpies= -3155.056722

Sum of electronic and thermal Free Energies= -3155.188

|    |              |              |              |
|----|--------------|--------------|--------------|
| Fe | 0.437714000  | -0.958011000 | 0.154512000  |
| N  | -1.171353000 | 0.536456000  | -0.037948000 |
| N  | -1.059884000 | -1.642152000 | 1.608297000  |
| N  | -0.978718000 | -1.912028000 | -1.233920000 |
| N  | 1.055163000  | 0.480971000  | 1.591827000  |
| N  | 1.158247000  | 0.193466000  | -1.475707000 |

|    |              |              |              |
|----|--------------|--------------|--------------|
| O  | 1.674863000  | -2.114460000 | 0.300054000  |
| C  | -0.874584000 | -2.400819000 | 2.697368000  |
| C  | -1.927432000 | -2.725042000 | 3.548667000  |
| C  | -3.202832000 | -2.240636000 | 3.250956000  |
| C  | -3.398671000 | -1.449648000 | 2.116823000  |
| C  | -2.290671000 | -1.171995000 | 1.318266000  |
| C  | -2.358626000 | -0.384913000 | 0.016995000  |
| C  | -2.222342000 | -1.405272000 | -1.104098000 |
| C  | -3.287464000 | -1.839002000 | -1.891478000 |
| C  | -3.034156000 | -2.829976000 | -2.842176000 |
| C  | -1.745805000 | -3.351821000 | -2.975104000 |
| C  | -0.738890000 | -2.863008000 | -2.147249000 |
| C  | 2.262476000  | 0.465675000  | 2.187330000  |
| C  | 2.682464000  | 1.487841000  | 3.023679000  |
| C  | 1.831169000  | 2.575331000  | 3.229526000  |
| C  | 0.587576000  | 2.590098000  | 2.609617000  |
| C  | 0.224288000  | 1.521725000  | 1.790347000  |
| C  | -1.128813000 | 1.485508000  | 1.116971000  |
| C  | -1.051636000 | 1.242631000  | -1.350634000 |
| C  | 0.346373000  | 1.170800000  | -1.921876000 |
| C  | 0.770493000  | 2.072630000  | -2.897109000 |
| C  | 2.055671000  | 1.956875000  | -3.413047000 |
| C  | 2.887592000  | 0.936219000  | -2.948325000 |
| C  | 2.405867000  | 0.082078000  | -1.969114000 |
| H  | 0.139485000  | -2.747162000 | 2.870994000  |
| H  | -1.746996000 | -3.342765000 | 4.422273000  |
| H  | -4.043947000 | -2.474529000 | 3.896960000  |
| H  | -4.370938000 | -1.052446000 | 1.843805000  |
| H  | -3.291542000 | 0.171080000  | -0.063503000 |
| H  | -4.272256000 | -1.405933000 | -1.748764000 |
| H  | -3.840643000 | -3.189529000 | -3.474465000 |
| H  | -1.520681000 | -4.123173000 | -3.704266000 |
| H  | 0.281577000  | -3.229397000 | -2.198876000 |
| H  | 2.889531000  | -0.391503000 | 1.964923000  |
| H  | 3.667348000  | 1.447340000  | 3.476448000  |
| H  | 2.143392000  | 3.415874000  | 3.840461000  |
| H  | -0.075951000 | 3.441390000  | 2.708170000  |
| H  | 0.118262000  | 2.883976000  | -3.198610000 |
| H  | 2.413434000  | 2.673443000  | -4.144961000 |
| H  | 3.902956000  | 0.824537000  | -3.313253000 |
| H  | 3.013611000  | -0.710536000 | -1.544816000 |
| H  | -1.378984000 | 2.495248000  | 0.785684000  |
| H  | -1.891763000 | 1.188027000  | 1.843676000  |
| H  | -1.331859000 | 2.292363000  | -1.243029000 |
| H  | -1.757915000 | 0.793077000  | -2.056010000 |
| Cl | 1.795801000  | 4.124485000  | -0.278472000 |
| O  | 2.200650000  | 4.766022000  | -1.560083000 |
| O  | 0.305120000  | 3.858946000  | -0.309945000 |
| O  | 2.107820000  | 4.999373000  | 0.885494000  |
| O  | 2.508256000  | 2.808799000  | -0.126037000 |
| Cl | -5.838908000 | 0.540682000  | -0.169770000 |
| O  | -5.122901000 | 1.107759000  | 1.028565000  |
| O  | -7.214790000 | 1.071357000  | -0.262836000 |
| O  | -5.852106000 | -0.963332000 | -0.033999000 |
| O  | -5.043397000 | 0.887710000  | -1.401381000 |
| C  | 6.195881000  | -1.399413000 | 0.334597000  |
| C  | 5.631019000  | -1.845645000 | 1.650293000  |
| C  | 4.643440000  | -2.755564000 | 1.738258000  |
| C  | 3.996338000  | -3.335587000 | 0.543430000  |
| C  | 4.664083000  | -3.071852000 | -0.756160000 |
| C  | 5.652294000  | -2.155477000 | -0.842706000 |
| H  | 6.018887000  | -0.316874000 | 0.200555000  |

|   |             |              |              |
|---|-------------|--------------|--------------|
| H | 3.689078000 | -4.381741000 | 0.673358000  |
| H | 7.295715000 | -1.483460000 | 0.354880000  |
| H | 2.905369000 | -2.804702000 | 0.454532000  |
| C | 4.153737000 | -3.828708000 | -1.954180000 |
| H | 3.079090000 | -3.649847000 | -2.093361000 |
| H | 4.672385000 | -3.535904000 | -2.872116000 |
| H | 4.280211000 | -4.911153000 | -1.820184000 |
| H | 6.070646000 | -1.423699000 | 2.551504000  |
| H | 4.273405000 | -3.067458000 | 2.712704000  |
| H | 6.115984000 | -1.956702000 | -1.807640000 |

### **<sup>5</sup>IH**

Zero-point correction= 0.588205 (Hartree/Particle)  
 Thermal correction to Energy= 0.634036  
 Thermal correction to Enthalpy= 0.634980  
 Thermal correction to Gibbs Free Energy= 0.499609  
 Sum of electronic and zero-point Energies= -3155.12441  
 Sum of electronic and thermal Energies= -3155.078584  
 Sum of electronic and thermal Enthalpies= -3155.077640  
 Sum of electronic and thermal Free Energies= -3155.213

|    |              |              |              |
|----|--------------|--------------|--------------|
| Fe | 0.297845000  | -1.041786000 | 0.016502000  |
| N  | -1.162466000 | 0.434918000  | -0.095481000 |
| N  | -1.034771000 | -1.780154000 | -1.350124000 |
| N  | -1.199066000 | -1.877928000 | -1.562545000 |
| N  | 1.044389000  | 0.403959000  | 1.575077000  |
| N  | 1.161646000  | 0.034030000  | -1.427715000 |
| O  | 1.460652000  | -2.379590000 | 0.111473000  |
| C  | -0.783158000 | -2.634915000 | 2.352190000  |
| C  | -1.797967000 | -3.071015000 | 3.197808000  |
| C  | -3.097114000 | -2.603376000 | 2.988835000  |
| C  | -3.358800000 | -1.716937000 | 1.942387000  |
| C  | -2.291666000 | -1.325231000 | 1.137987000  |
| C  | -2.406326000 | -0.427793000 | -0.080721000 |
| C  | -2.400460000 | -1.333312000 | -1.301398000 |
| C  | -3.542700000 | -1.616319000 | -2.048013000 |
| C  | -3.411599000 | -2.513005000 | -3.111239000 |
| C  | -2.166302000 | -3.081086000 | -3.386009000 |
| C  | -1.078742000 | -2.732191000 | -2.585657000 |
| C  | 2.245280000  | 0.423981000  | 2.176920000  |
| C  | 2.652071000  | 1.465373000  | 2.999097000  |
| C  | 1.787960000  | 2.545491000  | 3.183521000  |
| C  | 0.548004000  | 2.531515000  | 2.555946000  |
| C  | 0.209601000  | 1.437601000  | 1.758824000  |
| C  | -1.146165000 | 1.352811000  | 1.099595000  |
| C  | -0.984008000 | 1.198887000  | -1.380612000 |
| C  | 0.409355000  | 1.039605000  | -1.925681000 |
| C  | 0.907126000  | 1.891209000  | -2.909275000 |
| C  | 2.199077000  | 1.699806000  | -3.383020000 |
| C  | 2.962308000  | 0.652236000  | -2.867148000 |
| C  | 2.414122000  | -0.154683000 | -1.882253000 |
| H  | 0.244260000  | -2.967557000 | 2.444681000  |
| H  | -1.568267000 | -3.764116000 | 4.000112000  |
| H  | -3.906875000 | -2.925258000 | 3.636858000  |
| H  | -4.353590000 | -1.332518000 | 1.735178000  |
| H  | -3.295904000 | 0.199057000  | -0.057042000 |
| H  | -4.485890000 | -1.142796000 | -1.793967000 |
| H  | -4.276075000 | -2.761345000 | -3.719930000 |
| H  | -2.034198000 | -3.780308000 | -4.205330000 |
| H  | -0.086899000 | -3.141953000 | -2.755060000 |
| H  | 2.901343000  | -0.419593000 | 1.983232000  |
| H  | 3.635745000  | 1.443240000  | 3.455977000  |
| H  | 2.086369000  | 3.399985000  | 3.781896000  |

|    |              |              |              |
|----|--------------|--------------|--------------|
| H  | -0.130760000 | 3.372725000  | 2.637427000  |
| H  | 0.305262000  | 2.726408000  | -3.247264000 |
| H  | 2.613100000  | 2.378511000  | -4.120988000 |
| H  | 3.979323000  | 0.474701000  | -3.199425000 |
| H  | 2.969409000  | -0.972069000 | -1.438151000 |
| H  | -1.470217000 | 2.348846000  | 0.793307000  |
| H  | -1.886817000 | 0.985483000  | 1.816082000  |
| H  | -1.171686000 | 2.260133000  | -1.210651000 |
| H  | -1.718593000 | 0.840116000  | -2.106931000 |
| Cl | 1.825566000  | 4.020611000  | -0.372470000 |
| O  | 2.204573000  | 4.595526000  | -1.694812000 |
| O  | 0.331866000  | 3.766182000  | -0.360250000 |
| O  | 2.169668000  | 4.946953000  | 0.738458000  |
| O  | 2.531768000  | 2.707407000  | -0.176389000 |
| Cl | -5.738522000 | 0.794499000  | 0.271153000  |
| O  | -4.822912000 | 1.176250000  | 1.404658000  |
| O  | -7.047963000 | 1.464706000  | 0.398538000  |
| O  | -5.900390000 | -0.707933000 | 0.288458000  |
| O  | -5.063154000 | 1.169673000  | -1.023269000 |
| C  | 6.109815000  | -0.929669000 | 0.261989000  |
| C  | 5.762015000  | -1.255729000 | 1.684108000  |
| C  | 4.998054000  | -2.345203000 | 2.003475000  |
| C  | 4.497143000  | -3.218005000 | 1.001898000  |
| C  | 4.810056000  | -3.002089000 | -0.378070000 |
| C  | 5.571412000  | -1.919742000 | -0.731549000 |
| H  | 5.756555000  | 0.089610000  | 0.012723000  |
| H  | 3.922587000  | -4.095464000 | 1.286134000  |
| H  | 7.207957000  | -0.847601000 | 0.153180000  |
| H  | 2.331440000  | -2.196381000 | 0.511260000  |
| C  | 4.287717000  | -3.978938000 | -1.406747000 |
| H  | 3.190919000  | -3.996661000 | -1.398206000 |
| H  | 4.620419000  | -3.716554000 | -2.415859000 |
| H  | 4.631799000  | -4.998207000 | -1.192251000 |
| H  | 6.146106000  | -0.602390000 | 2.463159000  |
| H  | 4.774844000  | -2.560260000 | 3.046440000  |
| H  | 5.826992000  | -1.761011000 | -1.777537000 |

**2+DHT**

**<sup>3</sup>TS**

Zero-point correction= 0.534173 (Hartree/Particle)  
 Thermal correction to Energy= 0.567019  
 Thermal correction to Enthalpy= 0.567963  
 Thermal correction to Gibbs Free Energy= 0.467770  
 Sum of electronic and zero-point Energies= -1672.68525  
 Sum of electronic and thermal Energies= -1672.652412  
 Sum of electronic and thermal Enthalpies= -1672.651468  
 Sum of electronic and thermal Free Energies= -1672.751

|    |              |              |              |
|----|--------------|--------------|--------------|
| Fe | -0.467331000 | 0.210678000  | 0.072577000  |
| O  | -1.104001000 | 1.368351000  | 1.452891000  |
| O  | -0.991477000 | -1.316931000 | 1.098703000  |
| C  | 1.783068000  | 1.671144000  | -0.748219000 |
| C  | -0.166977000 | 2.755448000  | -1.451035000 |
| C  | 2.579234000  | 2.668829000  | -1.307760000 |
| C  | 0.566706000  | 3.791667000  | -2.025170000 |
| H  | -1.250014000 | 2.702816000  | -1.469335000 |
| C  | 1.957165000  | 3.742388000  | -1.951833000 |
| H  | 3.659439000  | 2.624053000  | -1.242878000 |
| H  | 0.054622000  | 4.612134000  | -2.516158000 |
| H  | 2.560334000  | 4.532883000  | -2.388808000 |
| C  | 0.141672000  | -1.841137000 | -2.016763000 |
| C  | 1.955798000  | -0.724767000 | -1.046059000 |
| C  | 0.986671000  | -2.573584000 | -2.848760000 |

|   |              |              |              |
|---|--------------|--------------|--------------|
| H | -0.938835000 | -1.935406000 | -2.024039000 |
| C | 2.854657000  | -1.405039000 | -1.862763000 |
| C | 2.358803000  | -2.344395000 | -2.771983000 |
| H | 0.571760000  | -3.297868000 | -3.541353000 |
| H | 3.918777000  | -1.218836000 | -1.794201000 |
| H | 3.045417000  | -2.891539000 | -3.411396000 |
| N | 0.628191000  | -0.942702000 | -1.154614000 |
| N | 0.440148000  | 1.732818000  | -0.840181000 |
| N | 1.313381000  | 0.177749000  | 1.118789000  |
| O | -1.850017000 | 0.253345000  | -0.940258000 |
| C | 1.323424000  | -1.165757000 | 1.781587000  |
| H | 1.976475000  | -1.845147000 | 1.230850000  |
| H | 1.717098000  | -1.089529000 | 2.797656000  |
| C | -0.072469000 | -1.844618000 | 1.846111000  |
| O | -0.179108000 | -2.839871000 | 2.546764000  |
| C | 1.222814000  | 1.297379000  | 2.101100000  |
| H | 1.779776000  | 2.161651000  | 1.729029000  |
| C | -0.238818000 | 1.773765000  | 2.334180000  |
| O | -0.449677000 | 2.521441000  | 3.275728000  |
| C | 2.285876000  | 0.389056000  | -0.028583000 |
| C | 3.774909000  | 0.552522000  | 0.379159000  |
| C | 4.425377000  | -0.404153000 | 1.404587000  |
| H | 4.381615000  | 0.581783000  | -0.534651000 |
| H | 3.853567000  | 1.558275000  | 0.806819000  |
| C | 4.874855000  | -1.797976000 | 0.927703000  |
| H | 5.316115000  | 0.118110000  | 1.780073000  |
| H | 3.766849000  | -0.506350000 | 2.271092000  |
| C | 6.108383000  | -1.775307000 | 0.015742000  |
| H | 5.113331000  | -2.394297000 | 1.817285000  |
| H | 6.389978000  | -2.788335000 | -0.291839000 |
| H | 5.947685000  | -1.188902000 | -0.898146000 |
| H | 6.968233000  | -1.333486000 | 0.533586000  |
| H | 4.052472000  | -2.325990000 | 0.430485000  |
| H | 1.668720000  | 1.013903000  | 3.057977000  |
| C | -6.262638000 | -1.576692000 | -0.963312000 |
| C | -5.187806000 | -2.399609000 | -0.308643000 |
| C | -4.155813000 | -1.847904000 | 0.352427000  |
| C | -3.967599000 | -0.387969000 | -0.448687000 |
| C | -5.077988000 | 0.452594000  | -0.060878000 |
| C | -6.111611000 | -0.098960000 | -0.726995000 |
| H | -6.285690000 | -1.782838000 | -2.049711000 |
| H | -3.556351000 | -0.056169000 | 1.408968000  |
| H | -7.255370000 | -1.910663000 | -0.611974000 |
| H | -2.976652000 | -0.110170000 | -0.241858000 |
| C | -4.966345000 | 1.936989000  | 0.171587000  |
| H | -4.022442000 | 2.317792000  | -0.239016000 |
| H | -5.796370000 | 2.485576000  | -0.286707000 |
| H | -4.949485000 | 2.167190000  | 1.245042000  |
| H | -5.284427000 | -3.482539000 | -0.369666000 |
| H | -3.395693000 | -2.466172000 | 0.822571000  |
| H | -6.906231000 | 0.541211000  | -1.109960000 |

**<sup>3</sup>IH**

Zero-point correction= 0.537518 (Hartree/Particle)  
 Thermal correction to Energy= 0.571449  
 Thermal correction to Enthalpy= 0.572393  
 Thermal correction to Gibbs Free Energy= 0.468198  
 Sum of electronic and zero-point Energies= -1672.72209  
 Sum of electronic and thermal Energies= -1672.688164  
 Sum of electronic and thermal Enthalpies= -1672.687220  
 Sum of electronic and thermal Free Energies= -1672.791

|    |              |             |              |
|----|--------------|-------------|--------------|
| Fe | -0.384715000 | 0.013774000 | -0.207284000 |
|----|--------------|-------------|--------------|





|   |              |              |              |
|---|--------------|--------------|--------------|
| C | -5.577109000 | 1.738739000  | 1.263904000  |
| C | -5.679060000 | 0.347537000  | 1.820965000  |
| C | -5.268013000 | -0.732458000 | 1.139046000  |
| C | -4.631914000 | -0.644454000 | -0.195830000 |
| C | -4.645050000 | 0.700320000  | -0.838066000 |
| C | -5.052967000 | 1.784076000  | -0.145327000 |
| H | -6.565233000 | 2.229539000  | 1.307851000  |
| H | -3.475450000 | -0.936620000 | -0.078636000 |
| H | -4.946891000 | 2.360944000  | 1.925934000  |
| H | -4.950360000 | -1.444097000 | -0.878623000 |
| C | -4.153662000 | 0.786019000  | -2.259609000 |
| H | -4.737805000 | 0.123171000  | -2.912267000 |
| H | -4.234513000 | 1.805382000  | -2.651271000 |
| H | -3.105750000 | 0.469467000  | -2.340030000 |
| H | -6.125804000 | 0.236793000  | 2.807389000  |
| H | -5.374795000 | -1.724077000 | 1.574809000  |
| H | -5.047887000 | 2.758938000  | -0.632093000 |

**<sup>5</sup>H**

Zero-point correction= 0.534827 (Hartree/Particle)  
 Thermal correction to Energy= 0.569863  
 Thermal correction to Enthalpy= 0.570807  
 Thermal correction to Gibbs Free Energy= 0.463958  
 Sum of electronic and zero-point Energies= -1672.73207  
 Sum of electronic and thermal Energies= -1672.697039  
 Sum of electronic and thermal Enthalpies= -1672.696095  
 Sum of electronic and thermal Free Energies= -1672.802

|    |              |              |              |
|----|--------------|--------------|--------------|
| Fe | -0.769933000 | -0.446150000 | 0.144623000  |
| O  | -1.234190000 | -1.153604000 | -1.607981000 |
| O  | -1.279984000 | 1.397535000  | -0.166366000 |
| C  | 2.044340000  | -1.732464000 | 0.012927000  |
| C  | 0.443351000  | -3.323157000 | 0.599027000  |
| C  | 3.053684000  | -2.697241000 | 0.044610000  |
| C  | 1.393511000  | -4.342314000 | 0.640839000  |
| H  | -0.606062000 | -3.484832000 | 0.824177000  |
| C  | 2.717374000  | -4.017018000 | 0.357528000  |
| H  | 4.082990000  | -2.440907000 | -0.171474000 |
| H  | 1.098353000  | -5.355793000 | 0.890853000  |
| H  | 3.490278000  | -4.780072000 | 0.379495000  |
| C  | 0.473419000  | 0.819698000  | 2.801401000  |
| C  | 2.068824000  | 0.402907000  | 1.153829000  |
| C  | 1.438936000  | 1.288169000  | 3.692010000  |
| H  | -0.580044000 | 0.763345000  | 3.057594000  |
| C  | 3.092503000  | 0.836858000  | 1.995997000  |
| C  | 2.768141000  | 1.290424000  | 3.277448000  |
| H  | 1.151191000  | 1.632172000  | 4.679764000  |
| H  | 4.124136000  | 0.829635000  | 1.669720000  |
| H  | 3.553432000  | 1.640227000  | 3.941550000  |
| N  | 0.791858000  | 0.392187000  | 1.576308000  |
| N  | 0.774064000  | -2.065637000 | 0.290204000  |
| N  | 1.107812000  | 0.244386000  | -1.094638000 |
| O  | -1.827291000 | -1.199792000 | 1.438551000  |
| C  | 0.895200000  | 1.712318000  | -1.198900000 |
| H  | 1.564303000  | 2.233920000  | -0.510649000 |
| H  | 1.131566000  | 2.072123000  | -2.204337000 |
| C  | -0.533488000 | 2.208998000  | -0.857937000 |
| O  | -0.839365000 | 3.337612000  | -1.211901000 |
| C  | 0.954832000  | -0.456751000 | -2.391314000 |
| H  | 1.634763000  | -1.312952000 | -2.431819000 |
| C  | -0.463290000 | -1.031572000 | -2.654731000 |
| O  | -0.734287000 | -1.376498000 | -3.792388000 |
| C  | 2.263866000  | -0.211683000 | -0.254519000 |

|   |              |              |              |
|---|--------------|--------------|--------------|
| C | 3.665934000  | -0.000293000 | -0.903890000 |
| C | 4.038659000  | 1.338753000  | -1.580546000 |
| H | 4.437672000  | -0.265713000 | -0.171392000 |
| H | 3.742670000  | -0.763786000 | -1.686004000 |
| C | 4.453371000  | 2.526116000  | -0.690815000 |
| H | 4.886225000  | 1.114551000  | -2.243196000 |
| H | 3.228866000  | 1.644264000  | -2.247584000 |
| C | 5.841702000  | 2.371461000  | -0.056220000 |
| H | 4.458594000  | 3.427683000  | -1.316300000 |
| H | 6.090325000  | 3.238308000  | 0.565958000  |
| H | 5.918914000  | 1.479834000  | 0.579231000  |
| H | 6.615338000  | 2.282983000  | -0.828529000 |
| H | 3.705378000  | 2.711966000  | 0.089044000  |
| H | 1.221101000  | 0.194861000  | -3.229835000 |
| C | -5.944739000 | -0.160064000 | 1.528573000  |
| C | -5.304363000 | -1.285351000 | 0.766302000  |
| C | -4.574890000 | -1.052451000 | -0.370489000 |
| C | -4.351444000 | 0.260839000  | -0.853759000 |
| C | -4.880240000 | 1.393398000  | -0.160468000 |
| C | -5.630974000 | 1.198943000  | 0.966843000  |
| H | -7.043574000 | -0.309421000 | 1.559387000  |
| H | -2.783974000 | -1.160583000 | 1.253106000  |
| H | -5.656148000 | -0.206441000 | 2.596030000  |
| H | -3.737427000 | 0.405777000  | -1.735818000 |
| C | -4.582517000 | 2.777012000  | -0.688623000 |
| H | -4.949872000 | 2.890898000  | -1.716971000 |
| H | -5.057157000 | 3.550073000  | -0.074798000 |
| H | -3.502160000 | 2.963039000  | -0.708350000 |
| H | -5.472460000 | -2.300869000 | 1.117971000  |
| H | -4.136516000 | -1.884204000 | -0.917457000 |
| H | -6.037868000 | 2.058050000  | 1.497249000  |

**3+EB**

**<sup>3</sup>TS**

Zero-point correction= 0.385783 (Hartree/Particle)  
 Thermal correction to Energy= 0.413379  
 Thermal correction to Enthalpy= 0.414323  
 Thermal correction to Gibbs Free Energy= 0.326238  
 Sum of electronic and zero-point Energies= -1534.00917  
 Sum of electronic and thermal Energies= -1533.981584  
 Sum of electronic and thermal Enthalpies= -1533.980640  
 Sum of electronic and thermal Free Energies= -1534.068

|    |              |              |              |
|----|--------------|--------------|--------------|
| Fe | 0.472507000  | -0.468289000 | -0.501214000 |
| O  | -0.517987000 | -0.559233000 | 1.169300000  |
| O  | 0.581008000  | -2.379632000 | -0.516238000 |
| C  | 2.009981000  | 1.814547000  | 0.033570000  |
| C  | -0.200017000 | 2.458112000  | -0.383608000 |
| C  | 2.392884000  | 3.139402000  | 0.243985000  |
| C  | 0.112265000  | 3.802359000  | -0.185581000 |
| H  | -1.189850000 | 2.098265000  | -0.644706000 |
| C  | 1.427394000  | 4.141660000  | 0.132387000  |
| H  | 3.421585000  | 3.379711000  | 0.487009000  |
| H  | -0.660158000 | 4.558475000  | -0.281388000 |
| H  | 1.703412000  | 5.180619000  | 0.293681000  |
| C  | 2.976451000  | 0.189814000  | -1.510488000 |
| N  | 0.732356000  | 1.509338000  | -0.274383000 |
| N  | 2.140533000  | -0.511084000 | 0.689485000  |
| O  | -0.908468000 | -0.228023000 | -1.518925000 |
| C  | 2.706678000  | -1.877293000 | 0.498273000  |
| H  | 3.485353000  | -1.843209000 | -0.268049000 |
| H  | 3.167359000  | -2.241294000 | 1.421587000  |
| C  | 1.642918000  | -2.897987000 | 0.012184000  |

|   |              |              |              |
|---|--------------|--------------|--------------|
| O | 1.901856000  | -4.091528000 | 0.122422000  |
| C | 1.689762000  | -0.264367000 | 2.085216000  |
| H | 1.911708000  | 0.769759000  | 2.365991000  |
| C | 0.162376000  | -0.465391000 | 2.266681000  |
| O | -0.288440000 | -0.471949000 | 3.408143000  |
| C | 2.918838000  | 0.597961000  | 0.034571000  |
| H | 2.224385000  | -0.908890000 | 2.789165000  |
| O | 1.875242000  | -0.328348000 | -1.917594000 |
| O | 4.005825000  | 0.412669000  | -2.140948000 |
| C | 4.305356000  | 0.835990000  | 0.618628000  |
| H | 4.856708000  | 1.533145000  | -0.016865000 |
| H | 4.258907000  | 1.226063000  | 1.642708000  |
| H | 4.871464000  | -0.099449000 | 0.627591000  |
| C | -3.946504000 | -0.529155000 | -0.500115000 |
| C | -4.968429000 | -0.012974000 | -1.322006000 |
| C | -5.846278000 | 0.968284000  | -0.862664000 |
| C | -5.720563000 | 1.469009000  | 0.435652000  |
| C | -4.700345000 | 0.981581000  | 1.259871000  |
| C | -3.822408000 | 0.000368000  | 0.803229000  |
| H | -5.073673000 | -0.399954000 | -2.333762000 |
| H | -6.631244000 | 1.340519000  | -1.518285000 |
| H | -6.403877000 | 2.233733000  | 0.798739000  |
| H | -4.581917000 | 1.374586000  | 2.267470000  |
| H | -3.006925000 | -0.335259000 | 1.436766000  |
| C | -3.015816000 | -1.559269000 | -1.012820000 |
| H | -3.273730000 | -1.871036000 | -2.031394000 |
| H | -1.885129000 | -0.904620000 | -1.241891000 |
| C | -2.647097000 | -2.731794000 | -0.119877000 |
| H | -1.856444000 | -3.328231000 | -0.581752000 |
| H | -2.265222000 | -2.397073000 | 0.847105000  |
| H | -3.525080000 | -3.374927000 | 0.054332000  |

### <sup>3</sup>H

Zero-point correction= 0.389150 (Hartree/Particle)  
 Thermal correction to Energy= 0.418200  
 Thermal correction to Enthalpy= 0.419144  
 Thermal correction to Gibbs Free Energy= 0.325512  
 Sum of electronic and zero-point Energies= -1534.03562  
 Sum of electronic and thermal Energies= -1534.006575  
 Sum of electronic and thermal Enthalpies= -1534.005631  
 Sum of electronic and thermal Free Energies= -1534.099

|    |              |              |              |
|----|--------------|--------------|--------------|
| Fe | 1.121814000  | -0.251762000 | -0.987544000 |
| O  | -0.478253000 | 0.471961000  | -0.168026000 |
| O  | 0.222174000  | -1.951604000 | -1.095362000 |
| C  | 3.049449000  | 1.178123000  | 0.413381000  |
| C  | 2.060575000  | 2.585920000  | -1.172862000 |
| C  | 3.871355000  | 2.209427000  | 0.867065000  |
| C  | 2.852803000  | 3.661161000  | -0.770966000 |
| H  | 1.330755000  | 2.635744000  | -1.974775000 |
| C  | 3.766087000  | 3.465278000  | 0.264835000  |
| H  | 4.578857000  | 2.033451000  | 1.669356000  |
| H  | 2.752323000  | 4.624100000  | -1.261323000 |
| H  | 4.396167000  | 4.283453000  | 0.604150000  |
| C  | 3.706911000  | -1.030767000 | -0.376387000 |
| N  | 2.168050000  | 1.391762000  | -0.587831000 |
| N  | 1.646491000  | -0.736971000 | 0.913670000  |
| O  | 0.727737000  | 0.272693000  | -2.652481000 |
| C  | 1.440528000  | -2.215604000 | 0.976666000  |
| H  | 2.388373000  | -2.721303000 | 0.776347000  |
| H  | 1.107625000  | -2.517851000 | 1.973953000  |
| C  | 0.420394000  | -2.732152000 | -0.083417000 |
| O  | -0.073042000 | -3.840165000 | 0.105713000  |

|   |              |              |              |
|---|--------------|--------------|--------------|
| C | 0.747350000  | 0.002734000  | 1.836493000  |
| H | 1.258128000  | 0.897376000  | 2.206013000  |
| C | -0.541096000 | 0.474328000  | 1.120326000  |
| O | -1.489101000 | 0.847623000  | 1.812278000  |
| C | 3.078532000  | -0.272353000 | 0.876942000  |
| H | 0.486659000  | -0.604752000 | 2.708187000  |
| O | 2.875160000  | -1.106079000 | -1.352599000 |
| O | 4.862514000  | -1.437295000 | -0.312606000 |
| C | 3.864178000  | -0.522423000 | 2.157154000  |
| H | 4.924199000  | -0.323043000 | 1.981872000  |
| H | 3.504185000  | 0.094239000  | 2.989513000  |
| H | 3.782256000  | -1.574965000 | 2.442740000  |
| C | -5.317456000 | -0.371446000 | -0.018456000 |
| C | -6.686066000 | -0.262341000 | -0.409475000 |
| C | -7.378145000 | 0.934440000  | -0.304356000 |
| C | -6.739011000 | 2.080164000  | 0.192878000  |
| C | -5.393369000 | 1.999387000  | 0.579365000  |
| C | -4.685402000 | 0.808328000  | 0.481608000  |
| H | -7.187759000 | -1.147396000 | -0.797122000 |
| H | -8.421485000 | 0.983437000  | -0.610895000 |
| H | -7.280775000 | 3.019628000  | 0.274229000  |
| H | -4.886517000 | 2.882940000  | 0.961250000  |
| H | -3.641005000 | 0.783022000  | 0.783595000  |
| C | -4.642321000 | -1.611772000 | -0.132021000 |
| H | -5.208457000 | -2.437187000 | -0.563077000 |
| H | 0.001829000  | -0.311143000 | -2.933578000 |
| C | -3.218646000 | -1.865369000 | 0.243455000  |
| H | -2.512721000 | -1.479891000 | -0.507781000 |
| H | -2.947630000 | -1.369646000 | 1.183420000  |
| H | -3.011363000 | -2.935389000 | 0.340484000  |

### <sup>5</sup>TS

Zero-point correction= 0.384318 (Hartree/Particle)  
 Thermal correction to Energy= 0.412983  
 Thermal correction to Enthalpy= 0.413928  
 Thermal correction to Gibbs Free Energy= 0.321492  
 Sum of electronic and zero-point Energies= -1534.01679  
 Sum of electronic and thermal Energies= -1533.988130  
 Sum of electronic and thermal Enthalpies= -1533.987186  
 Sum of electronic and thermal Free Energies= -1534.079

|    |              |              |              |
|----|--------------|--------------|--------------|
| Fe | -0.212024000 | -0.375235000 | -0.863203000 |
| O  | -1.577076000 | -0.687432000 | -2.253661000 |
| O  | 0.387385000  | -2.243742000 | -0.736579000 |
| C  | -2.328765000 | 1.172558000  | 0.762535000  |
| C  | -1.725380000 | 2.511700000  | -1.042676000 |
| C  | -3.234608000 | 2.137824000  | 1.214055000  |
| C  | -2.607700000 | 3.520876000  | -0.658195000 |
| H  | -1.096206000 | 2.589152000  | -1.924667000 |
| C  | -3.371982000 | 3.323013000  | 0.491347000  |
| H  | -3.818688000 | 1.966315000  | 2.110500000  |
| H  | -2.691432000 | 4.429569000  | -1.246042000 |
| H  | -4.073326000 | 4.083921000  | 0.824651000  |
| C  | -0.543504000 | 0.107837000  | 2.050675000  |
| N  | -1.597815000 | 1.381426000  | -0.346058000 |
| N  | -1.881843000 | -1.205876000 | 0.443998000  |
| O  | 0.979997000  | 0.563004000  | -1.744866000 |
| C  | -1.323130000 | -2.480172000 | 0.949853000  |
| H  | -0.840744000 | -2.304482000 | 1.916001000  |
| H  | -2.107572000 | -3.228298000 | 1.110808000  |
| C  | -0.230524000 | -3.088478000 | 0.031580000  |
| O  | 0.005415000  | -4.286218000 | 0.138971000  |
| C  | -3.046710000 | -1.389364000 | -0.450193000 |

|   |              |              |              |
|---|--------------|--------------|--------------|
| H | -3.869141000 | -0.732492000 | -0.149114000 |
| C | -2.767370000 | -1.104104000 | -1.950901000 |
| O | -3.695706000 | -1.276408000 | -2.733788000 |
| C | -2.012457000 | -0.136341000 | 1.478151000  |
| H | -3.427080000 | -2.413422000 | -0.374270000 |
| O | 0.361778000  | 0.055646000  | 1.141332000  |
| O | -0.409083000 | 0.347514000  | 3.247880000  |
| C | -2.993119000 | -0.473543000 | 2.601681000  |
| H | -2.924945000 | 0.273814000  | 3.395230000  |
| H | -4.026090000 | -0.532814000 | 2.237764000  |
| H | -2.728798000 | -1.435089000 | 3.049531000  |
| C | 4.014881000  | 0.942283000  | -0.329960000 |
| C | 5.300160000  | 0.902786000  | -0.897983000 |
| C | 6.281048000  | 0.043316000  | -0.403396000 |
| C | 5.988292000  | -0.807374000 | 0.664818000  |
| C | 4.708164000  | -0.792350000 | 1.227027000  |
| C | 3.728433000  | 0.070355000  | 0.738863000  |
| H | 5.529937000  | 1.561000000  | -1.733783000 |
| H | 7.271046000  | 0.034779000  | -0.854511000 |
| H | 6.747268000  | -1.485429000 | 1.048428000  |
| H | 4.464863000  | -1.467145000 | 2.043909000  |
| H | 2.726133000  | 0.048513000  | 1.159316000  |
| C | 2.979899000  | 1.873264000  | -0.864255000 |
| H | 3.357670000  | 2.435435000  | -1.726649000 |
| H | 2.086026000  | 1.189483000  | -1.326167000 |
| C | 2.279594000  | 2.781108000  | 0.143211000  |
| H | 1.531835000  | 3.402996000  | -0.361857000 |
| H | 1.764701000  | 2.194795000  | 0.909057000  |
| H | 3.001767000  | 3.446582000  | 0.637836000  |

**<sup>5</sup>IH**

Zero-point correction= 0.386660 (Hartree/Particle)  
 Thermal correction to Energy= 0.416823  
 Thermal correction to Enthalpy= 0.417767  
 Thermal correction to Gibbs Free Energy= 0.320898  
 Sum of electronic and zero-point Energies= -1534.05124  
 Sum of electronic and thermal Energies= -1534.021077  
 Sum of electronic and thermal Enthalpies= -1534.020133  
 Sum of electronic and thermal Free Energies= -1534.117

|    |              |              |              |
|----|--------------|--------------|--------------|
| Fe | -0.313929000 | -0.679153000 | -0.747308000 |
| O  | -1.733305000 | -1.779658000 | -1.573878000 |
| O  | 0.520490000  | -2.121675000 | 0.305087000  |
| C  | -2.474135000 | 1.357996000  | 0.057442000  |
| C  | -2.102703000 | 1.579270000  | -2.230684000 |
| C  | -3.445770000 | 2.362980000  | 0.026375000  |
| C  | -3.058934000 | 2.588151000  | -2.342391000 |
| H  | -1.528777000 | 1.221082000  | -3.080408000 |
| C  | -3.738770000 | 2.980233000  | -1.189979000 |
| H  | -3.960775000 | 2.657323000  | 0.933107000  |
| H  | -3.261119000 | 3.047322000  | -3.304897000 |
| H  | -4.493481000 | 3.761502000  | -1.234129000 |
| C  | -0.516239000 | 1.231655000  | 1.514563000  |
| N  | -1.829798000 | 0.991844000  | -1.064504000 |
| N  | -1.819811000 | -0.799618000 | 0.999148000  |
| O  | 0.806272000  | -0.241058000 | -2.137617000 |
| C  | -1.090525000 | -1.575022000 | 2.026817000  |
| H  | -0.613963000 | -0.886863000 | 2.731703000  |
| H  | -1.769485000 | -2.208182000 | 2.609101000  |
| C  | 0.051585000  | -2.464300000 | 1.469076000  |
| O  | 0.463196000  | -3.375775000 | 2.175904000  |
| C  | -3.012983000 | -1.490626000 | 0.465817000  |
| H  | -3.874108000 | -0.814405000 | 0.452886000  |

|   |              |              |              |
|---|--------------|--------------|--------------|
| C | -2.853432000 | -2.042922000 | -0.977316000 |
| O | -3.801644000 | -2.665274000 | -1.444702000 |
| C | -1.986935000 | 0.648433000  | 1.318216000  |
| H | -3.291511000 | -2.329373000 | 1.112815000  |
| O | 0.330354000  | 0.747867000  | 0.678860000  |
| C | -0.323610000 | 2.078612000  | 2.383486000  |
| O | -2.856262000 | 0.919214000  | 2.547011000  |
| H | -2.812926000 | 1.977492000  | 2.813666000  |
| H | -3.899022000 | 0.622741000  | 2.380896000  |
| H | -2.471347000 | 0.360954000  | 3.404529000  |
| C | 4.584563000  | 1.064094000  | 0.013463000  |
| C | 5.786542000  | 0.692496000  | -0.661854000 |
| C | 5.966820000  | -0.586875000 | -1.165767000 |
| C | 4.962753000  | -1.555859000 | -1.020619000 |
| C | 3.771125000  | -1.222198000 | -0.359054000 |
| C | 3.580130000  | 0.057466000  | 0.149862000  |
| H | 6.570154000  | 1.439176000  | -0.779961000 |
| H | 6.894137000  | -0.837812000 | -1.677467000 |
| H | 5.105221000  | -2.557502000 | -1.417795000 |
| H | 2.978659000  | -1.955985000 | -0.233945000 |
| H | 2.647111000  | 0.287466000  | 0.653707000  |
| C | 4.433735000  | 2.380605000  | 0.511786000  |
| H | 5.279721000  | 3.053887000  | 0.368440000  |
| H | 1.711117000  | -0.035872000 | -1.849331000 |
| C | 3.258993000  | 2.925181000  | 1.260659000  |
| H | 3.058010000  | 3.963715000  | 0.963507000  |
| H | 2.339678000  | 2.350870000  | 1.116536000  |
| H | 3.450781000  | 2.950730000  | 2.346887000  |

**4+EB**

**<sup>3</sup>TS**

Zero-point correction= 0.317690 (Hartree/Particle)  
 Thermal correction to Energy= 0.343433  
 Thermal correction to Enthalpy= 0.344377  
 Thermal correction to Gibbs Free Energy= 0.260498  
 Sum of electronic and zero-point Energies= -1474.93555  
 Sum of electronic and thermal Energies= -1474.909809  
 Sum of electronic and thermal Enthalpies= -1474.908865  
 Sum of electronic and thermal Free Energies= -1474.992

|    |              |              |              |
|----|--------------|--------------|--------------|
| Fe | 0.642104000  | -0.514590000 | -0.546499000 |
| O  | 1.935667000  | -1.325887000 | -1.773111000 |
| O  | 0.742958000  | 1.181179000  | -1.573956000 |
| O  | -0.298407000 | 0.474521000  | 0.901814000  |
| O  | 0.924989000  | -2.003814000 | 0.677202000  |
| O  | -0.752121000 | -1.130866000 | -1.364115000 |
| N  | 2.278756000  | 0.312687000  | 0.361930000  |
| C  | 3.151193000  | -0.919635000 | -1.665973000 |
| C  | 3.397720000  | 0.186585000  | -0.605409000 |
| C  | 1.802062000  | -1.833705000 | 1.606111000  |
| C  | 2.493140000  | -0.447762000 | 1.617783000  |
| H  | 4.343991000  | -0.010490000 | -0.088726000 |
| H  | 3.513001000  | 1.129208000  | -1.147834000 |
| H  | 3.561922000  | -0.578032000 | 1.821642000  |
| H  | 2.069783000  | 0.112553000  | 2.456643000  |
| O  | 2.110466000  | -2.639461000 | 2.488270000  |
| O  | 4.121487000  | -1.289250000 | -2.335377000 |
| C  | 1.716987000  | 1.696976000  | 0.535729000  |
| C  | 0.368472000  | 1.506443000  | 1.306361000  |
| C  | 1.290871000  | 2.138888000  | -0.907508000 |
| O  | 1.495701000  | 3.293984000  | -1.289156000 |
| O  | 0.030704000  | 2.299045000  | 2.188393000  |
| C  | 2.650594000  | 2.689939000  | 1.209529000  |

|   |              |              |              |
|---|--------------|--------------|--------------|
| H | 3.571684000  | 2.818461000  | 0.629701000  |
| H | 2.145311000  | 3.655074000  | 1.267730000  |
| H | 2.903338000  | 2.370537000  | 2.227250000  |
| C | -3.790286000 | -0.716132000 | -0.092848000 |
| C | -4.948179000 | -0.922915000 | -0.873689000 |
| C | -5.919163000 | 0.067232000  | -1.020338000 |
| C | -5.760250000 | 1.305668000  | -0.392888000 |
| C | -4.606899000 | 1.538334000  | 0.366815000  |
| C | -3.635220000 | 0.552197000  | 0.514718000  |
| H | -5.082412000 | -1.886366000 | -1.363429000 |
| H | -6.803951000 | -0.129597000 | -1.625391000 |
| H | -6.513744000 | 2.083367000  | -0.506644000 |
| H | -4.453141000 | 2.508163000  | 0.836358000  |
| H | -2.717832000 | 0.765453000  | 1.056593000  |
| C | -2.777912000 | -1.774182000 | 0.056163000  |
| H | -3.046935000 | -2.681770000 | -0.496937000 |
| H | -1.669855000 | -1.366457000 | -0.683461000 |
| C | -2.223124000 | -2.072467000 | 1.438309000  |
| H | -1.392704000 | -2.780027000 | 1.370367000  |
| H | -1.822573000 | -1.171675000 | 1.908734000  |
| H | -3.003478000 | -2.496271000 | 2.095963000  |

### <sup>3</sup>H

Zero-point correction= 0.321549 (Hartree/Particle)  
 Thermal correction to Energy= 0.348617  
 Thermal correction to Enthalpy= 0.349561  
 Thermal correction to Gibbs Free Energy= 0.261727  
 Sum of electronic and zero-point Energies= -1474.96514  
 Sum of electronic and thermal Energies= -1474.938077  
 Sum of electronic and thermal Enthalpies= -1474.937133  
 Sum of electronic and thermal Free Energies= -1475.024

|    |              |              |              |
|----|--------------|--------------|--------------|
| Fe | 1.277816000  | -0.522378000 | -0.924526000 |
| O  | 2.737315000  | -1.802908000 | -0.681629000 |
| O  | 2.552081000  | 0.860762000  | -1.528907000 |
| O  | -0.112563000 | 0.907121000  | -0.806399000 |
| O  | 0.140609000  | -1.752890000 | 0.091906000  |
| O  | 0.816863000  | -1.139876000 | -2.550503000 |
| N  | 1.789918000  | 0.225370000  | 0.894843000  |
| C  | 3.486491000  | -1.585926000 | 0.342314000  |
| C  | 3.152918000  | -0.305757000 | 1.161735000  |
| C  | 0.017773000  | -1.512089000 | 1.348414000  |
| C  | 0.774397000  | -0.261719000 | 1.861079000  |
| H  | 3.289976000  | -0.516134000 | 2.228449000  |
| H  | 3.891702000  | 0.450301000  | 0.881018000  |
| H  | 1.226707000  | -0.478896000 | 2.835418000  |
| H  | 0.023519000  | 0.518107000  | 2.018871000  |
| O  | -0.675584000 | -2.141770000 | 2.158030000  |
| O  | 4.457001000  | -2.255268000 | 0.710733000  |
| C  | 1.700733000  | 1.684157000  | 0.534504000  |
| C  | 0.251764000  | 1.870062000  | -0.035100000 |
| C  | 2.641295000  | 1.850434000  | -0.707627000 |
| O  | 3.360385000  | 2.847891000  | -0.813933000 |
| O  | -0.414284000 | 2.866746000  | 0.276769000  |
| C  | 2.029682000  | 2.646695000  | 1.664510000  |
| H  | 3.052096000  | 2.489921000  | 2.028054000  |
| H  | 1.955325000  | 3.667224000  | 1.285889000  |
| H  | 1.326276000  | 2.536018000  | 2.497684000  |
| C  | -4.487350000 | -0.673188000 | -0.108373000 |
| C  | -5.776116000 | -0.078678000 | 0.045468000  |
| C  | -5.932623000 | 1.298350000  | 0.104371000  |
| C  | -4.814213000 | 2.142471000  | 0.016031000  |
| C  | -3.534758000 | 1.588230000  | -0.140149000 |

|   |              |              |              |
|---|--------------|--------------|--------------|
| C | -3.369753000 | 0.209136000  | -0.206680000 |
| H | -6.646246000 | -0.730929000 | 0.120902000  |
| H | -6.929216000 | 1.723607000  | 0.223985000  |
| H | -4.939485000 | 3.222243000  | 0.069886000  |
| H | -2.648210000 | 2.218328000  | -0.195391000 |
| H | -2.365715000 | -0.184247000 | -0.334343000 |
| C | -4.351481000 | -2.083559000 | -0.152357000 |
| H | -5.268377000 | -2.664832000 | -0.041086000 |
| H | 1.105514000  | -2.068791000 | -0.251788000 |
| C | -3.059098000 | -2.825758000 | -0.273109000 |
| H | -3.238125000 | -3.883830000 | -0.502009000 |
| H | -2.406671000 | -2.412208000 | -1.052083000 |
| H | -2.454273000 | -2.777264000 | 0.647718000  |

### <sup>5</sup>TS

Zero-point correction= 0.316084 (Hartree/Particle)  
 Thermal correction to Energy= 0.342795  
 Thermal correction to Enthalpy= 0.343739  
 Thermal correction to Gibbs Free Energy= 0.256605  
 Sum of electronic and zero-point Energies= -1474.94986  
 Sum of electronic and thermal Energies= -1474.923159  
 Sum of electronic and thermal Enthalpies= -1474.922214  
 Sum of electronic and thermal Free Energies= -1475.009

|    |              |              |              |
|----|--------------|--------------|--------------|
| Fe | 0.440588000  | -0.064440000 | -0.715816000 |
| O  | -0.520769000 | 0.499188000  | 1.043590000  |
| O  | 1.026563000  | -1.812549000 | 0.302510000  |
| O  | 2.067161000  | -0.448915000 | -1.906808000 |
| O  | 0.550176000  | 1.885218000  | -1.227435000 |
| O  | -0.955032000 | -0.657558000 | -1.667107000 |
| N  | 2.193072000  | 0.585501000  | 0.567693000  |
| C  | 0.165524000  | 0.831106000  | 2.082927000  |
| C  | 1.703743000  | 0.674738000  | 1.954526000  |
| C  | 1.530508000  | 2.613353000  | -0.814121000 |
| C  | 2.624305000  | 1.879788000  | 0.008258000  |
| H  | 2.181396000  | 1.501875000  | 2.495539000  |
| H  | 1.961910000  | -0.245380000 | 2.488785000  |
| H  | 2.981764000  | 2.557110000  | 0.794595000  |
| H  | 3.463320000  | 1.716271000  | -0.675924000 |
| O  | 1.705308000  | 3.813206000  | -1.045700000 |
| O  | -0.280299000 | 1.208406000  | 3.171157000  |
| C  | 3.076714000  | -0.582020000 | 0.263882000  |
| C  | 3.188573000  | -0.651577000 | -1.299183000 |
| C  | 2.259574000  | -1.862620000 | 0.667256000  |
| O  | 2.821091000  | -2.784047000 | 1.269434000  |
| O  | 4.277451000  | -0.890315000 | -1.828890000 |
| C  | 4.443860000  | -0.534247000 | 0.936712000  |
| H  | 4.342783000  | -0.526298000 | 2.028168000  |
| H  | 5.010891000  | -1.421538000 | 0.652281000  |
| H  | 5.007362000  | 0.350774000  | 0.618720000  |
| C  | -4.011730000 | -0.765144000 | -0.310364000 |
| C  | -5.296457000 | -0.936575000 | -0.854223000 |
| C  | -6.314789000 | -0.010769000 | -0.617242000 |
| C  | -6.061904000 | 1.117257000  | 0.165743000  |
| C  | -4.782389000 | 1.309063000  | 0.699229000  |
| C  | -3.764495000 | 0.385238000  | 0.466866000  |
| H  | -5.496916000 | -1.814418000 | -1.467061000 |
| H  | -7.303397000 | -0.170400000 | -1.046132000 |
| H  | -6.850044000 | 1.845613000  | 0.350163000  |
| H  | -4.568053000 | 2.193908000  | 1.294614000  |
| H  | -2.762348000 | 0.559154000  | 0.858041000  |
| C  | -2.932856000 | -1.766468000 | -0.556363000 |
| H  | -3.251511000 | -2.525770000 | -1.281793000 |

|   |              |              |              |
|---|--------------|--------------|--------------|
| H | -2.009570000 | -1.181722000 | -1.126799000 |
| C | -2.281533000 | -2.389678000 | 0.674794000  |
| H | -1.425439000 | -3.005446000 | 0.385553000  |
| H | -1.895874000 | -1.616500000 | 1.343715000  |
| H | -3.006153000 | -3.010055000 | 1.226709000  |

**5H**

Zero-point correction= 0.319443 (Hartree/Particle)  
 Thermal correction to Energy= 0.347232  
 Thermal correction to Enthalpy= 0.348176  
 Thermal correction to Gibbs Free Energy= 0.258448  
 Sum of electronic and zero-point Energies= -1474.98707  
 Sum of electronic and thermal Energies= -1474.959283  
 Sum of electronic and thermal Enthalpies= -1474.958339  
 Sum of electronic and thermal Free Energies= -1475.048

|    |              |              |              |
|----|--------------|--------------|--------------|
| Fe | 0.790182000  | 0.026039000  | -1.082049000 |
| O  | -0.363449000 | 1.413340000  | -0.088752000 |
| O  | 0.132415000  | -1.337239000 | 0.391002000  |
| O  | 2.341328000  | -1.268249000 | -1.302851000 |
| O  | 1.937688000  | 1.549894000  | -1.786431000 |
| O  | -0.464837000 | -0.248092000 | -2.443594000 |
| N  | 2.090274000  | 0.465776000  | 0.744585000  |
| C  | -0.055765000 | 1.790553000  | 1.100713000  |
| C  | 1.236061000  | 1.181187000  | 1.708138000  |
| C  | 2.922295000  | 2.008309000  | -1.093918000 |
| C  | 3.219383000  | 1.263762000  | 0.236608000  |
| H  | 1.790349000  | 1.983879000  | 2.211387000  |
| H  | 0.905820000  | 0.489873000  | 2.490225000  |
| H  | 3.561017000  | 1.997393000  | 0.978515000  |

|   |              |              |              |
|---|--------------|--------------|--------------|
| H | 4.066335000  | 0.600173000  | 0.032811000  |
| O | 3.675105000  | 2.937393000  | -1.402769000 |
| O | -0.711310000 | 2.554908000  | 1.821848000  |
| C | 2.393553000  | -0.960452000 | 1.075646000  |
| C | 2.981424000  | -1.603500000 | -0.230081000 |
| C | 1.004952000  | -1.668275000 | 1.279656000  |
| O | 0.848310000  | -2.454760000 | 2.217961000  |
| O | 3.956007000  | -2.355750000 | -0.162831000 |
| C | 3.316870000  | -1.149237000 | 2.274147000  |
| H | 2.872749000  | -0.721764000 | 3.180524000  |
| H | 3.472139000  | -2.215908000 | 2.440780000  |
| H | 4.292488000  | -0.682916000 | 2.094461000  |
| C | -4.397706000 | -0.801250000 | -0.307520000 |
| C | -5.766516000 | -0.429026000 | -0.150730000 |
| C | -6.121525000 | 0.780990000  | 0.427863000  |
| C | -5.131930000 | 1.671959000  | 0.873807000  |
| C | -3.777556000 | 1.333595000  | 0.732856000  |
| C | -3.413629000 | 0.121514000  | 0.157063000  |
| H | -6.538499000 | -1.115761000 | -0.497962000 |
| H | -7.175160000 | 1.039345000  | 0.534433000  |
| H | -5.415361000 | 2.620591000  | 1.325800000  |
| H | -2.987921000 | 2.003028000  | 1.070292000  |
| H | -2.359271000 | -0.117201000 | 0.065997000  |
| C | -4.046493000 | -2.036649000 | -0.907887000 |
| H | -4.870563000 | -2.670609000 | -1.239165000 |
| H | -1.133695000 | 0.448102000  | -2.336957000 |
| C | -2.647187000 | -2.509974000 | -1.139253000 |
| H | -2.079391000 | -1.847962000 | -1.814681000 |
| H | -2.043457000 | -2.520365000 | -0.220810000 |
| H | -2.641658000 | -3.519962000 | -1.565792000 |
